# Supplementary material for: Understanding the magnetic anisotropy for linear sandwich [Er(COT)]+-based compounds: a theoretical investigation
Source: Royal Society of Chemistry journal article supplement (doi:10.1039/d1dt04157f), 2022-01-01
Supplement: d1dt04157f1.pdf [file d1dt04157f1.pdf]

## Supporting Information

### Understanding the Magnetic Anisotropy for Linear Sandwich

### [Er(COT)]<sup>+</sup>-based Compounds: A Theoretical Investigation

Man-Man Ding, Tao Shang, Rui Hu and Yi-Quan Zhang\*

*Jiangsu Key Lab for NSLSCS, School of Physical Science and Technology, Nanjing Normal*

*University, Nanjing 210023, P. R. China.*

**Table S1.** Calculated energy levels (cm<sup>-1</sup>), **g** ( $g_x$ ,  $g_y$ ,  $g_z$ ) tensors and predominant  $m_J$  values of the lowest eight Kramers doublets (KDs) of complexes **1–8** using CASSCF/RASSI-SO with OpenMolcas.<sup>S1</sup>

| KDs | <b>1</b> |                          |       | <b>2</b> |                          |       | <b>3</b> |                          |       |
|-----|----------|--------------------------|-------|----------|--------------------------|-------|----------|--------------------------|-------|
|     | <i>E</i> | <b>g</b>                 | $m_J$ | <i>E</i> | <b>g</b>                 | $m_J$ | <i>E</i> | <b>g</b>                 | $m_J$ |
| 1   | 0.0      | 0.000<br>0.000<br>17.886 | ±15/2 | 0.0      | 0.000<br>17.872          | ±15/2 | 0.0      | 0.000<br>17.949          | ±15/2 |
| 2   | 174.0    | 0.020<br>0.029<br>15.453 | ±13/2 | 148.8    | 0.015<br>0.018<br>16.333 | ±13/2 | 142.4    | 0.000<br>0.000<br>15.540 | ±13/2 |
| 3   | 223.5    | 0.657<br>1.491<br>12.100 | ±11/2 | 201.0    | 0.608<br>1.340<br>14.498 | ±3/2  | 271.3    | 9.615<br>9.466<br>1.225  | ±1/2  |
| 4   | 227.8    | 0.195<br>3.271<br>12.326 | ±3/2  | 213.0    | 0.379<br>2.069<br>10.881 | ±9/2  | 335.7    | 0.060<br>0.089<br>3.641  | ±3/2  |
| 5   | 244.4    | 9.498<br>5.601<br>1.065  | ±5/2  | 240.6    | 2.714<br>3.513<br>7.655  | ±1/2  | 354.7    | 0.001<br>0.001<br>13.104 | ±11/2 |
| 6   | 254.4    | 0.173<br>2.463<br>11.849 | ±7/2  | 250.6    | 1.935<br>4.440<br>7.379  | ±7/2  | 431.8    | 0.036<br>0.066<br>6.029  | ±5/2  |
| 7   | 264.0    | 7.664<br>5.791<br>3.103  | ±7/2  | 271.4    | 0.244<br>1.147<br>14.572 | ±3/2  | 486.9    | 0.015<br>0.022<br>10.744 | ±9/2  |
| 8   | 279.9    | 0.161<br>0.245<br>14.448 | ±9/2  | 295.6    | 0.099<br>0.152<br>16.069 | ±11/2 | 502.6    | 0.031<br>0.069<br>8.416  | ±7/2  |
| KDs | <b>4</b> |                          |       | <b>5</b> |                          |       | <b>6</b> |                          |       |
|     | <i>E</i> | <b>g</b>                 | $m_J$ | <i>E</i> | <b>g</b>                 | $m_J$ | <i>E</i> | <b>g</b>                 | $m_J$ |

|     |          |                          |                      |          |                          |                      |       |                          |            |
|-----|----------|--------------------------|----------------------|----------|--------------------------|----------------------|-------|--------------------------|------------|
| 1   | 0.0      | 0.000<br>0.000<br>17.933 | $\pm 15/2$           | 0.0      | 0.002<br>0.003<br>17.808 | $\pm 15/2$           | 0.0   | 0.000<br>0.000<br>17.947 | $\pm 15/2$ |
| 2   | 164.3    | 0.062<br>0.081<br>15.993 | $\pm 13/2$           | 158.9    | 0.316<br>0.460<br>15.055 | $\pm 13/2$           | 175.0 | 0.007<br>0.008<br>15.523 | $\pm 13/2$ |
| 3   | 185.1    | 0.567<br>1.956<br>14.481 | $\pm 3/2$            | 194.5    | 0.176<br>0.990<br>14.657 | $\pm 3/2$            | 219.4 | 10.094<br>9.007<br>1.227 | $\pm 1/2$  |
| 4   | 205.3    | 7.361<br>5.627<br>3.447  | $\pm 1/2$            | 227.9    | 4.211<br>5.659<br>7.221  | $\pm 1/2$            | 299.3 | 0.482<br>0.609<br>3.652  | $\pm 3/2$  |
| 5   | 222.6    | 0.655<br>1.303<br>9.200  | $\pm 7/2$            | 248.8    | 1.347<br>3.683<br>7.930  | $\pm 9/2$            | 402.7 | 0.008<br>0.012<br>13.083 | $\pm 11/2$ |
| 6   | 230.3    | 0.844<br>1.434<br>8.894  | $\pm 1/2$            | 258.3    | 0.289<br>3.685<br>10.000 | $\pm 3/2$            | 422.0 | 0.289<br>0.432<br>6.058  | $\pm 5/2$  |
| 7   | 258.5    | 0.348<br>0.732<br>14.970 | $\pm 5/2$            | 274.0    | 1.338<br>2.091<br>12.607 | $\pm 7/2$            | 523.4 | 0.046<br>0.706<br>8.545  | $\pm 7/2$  |
| 8   | 275.5    | 0.484<br>0.663<br>15.454 | $\pm 11/2$           | 300.1    | 0.174<br>0.379<br>15.818 | $\pm 9/2$            | 530.2 | 0.330<br>0.405<br>10.818 | $\pm 9/2$  |
| KDs | <b>7</b> |                          |                      | <b>8</b> |                          |                      |       |                          |            |
|     | <i>E</i> | <i>g</i>                 | <i>m<sub>J</sub></i> | <i>E</i> | <i>g</i>                 | <i>m<sub>J</sub></i> |       |                          |            |
| 1   | 0.0      | 0.000<br>0.000<br>17.941 | $\pm 15/2$           | 0.0      | 0.000<br>0.000<br>17.953 | $\pm 15/2$           |       |                          |            |
| 2   | 109.7    | 3.605<br>6.187<br>9.171  | $\pm 5/2$            | 159.7    | 0.006<br>0.006<br>15.491 | $\pm 13/2$           |       |                          |            |
| 3   | 127.4    | 2.069<br>5.073<br>9.248  | $\pm 7/2$            | 198.4    | 9.947<br>9.155<br>1.242  | $\pm 1/2$            |       |                          |            |
| 4   | 140.6    | 0.042<br>1.325<br>8.431  | $\pm 7/2$            | 272.9    | 0.357<br>0.444<br>3.691  | $\pm 3/2$            |       |                          |            |
| 5   | 158.2    | 7.110<br>4.592<br>1.628  | $\pm 1/2$            | 369.3    | 0.023<br>0.025<br>13.059 | $\pm 11/2$           |       |                          |            |
| 6   | 190.4    | 1.199<br>1.855<br>12.118 | $\pm 1/2$            | 385.7    | 0.153<br>0.234<br>6.083  | $\pm 5/2$            |       |                          |            |

|   |       |        |            |       |        |           |
|---|-------|--------|------------|-------|--------|-----------|
| 7 | 203.2 | 1.282  | $\pm 13/2$ | 476.0 | 0.059  | $\pm 7/2$ |
|   |       | 1.598  |            |       | 0.286  |           |
|   |       | 11.154 |            |       | 11.181 |           |
| 8 | 287.4 | 0.021  | $\pm 11/2$ | 489.2 | 0.055  | $\pm 9/2$ |
|   |       | 0.040  |            |       | 0.161  |           |
|   |       | 16.652 |            |       | 13.050 |           |

**Table S2.** Wave functions with definite projection of the total moment  $|m_J\rangle$  for the lowest two or three KDs of complexes **1–8**.

|          | $E/\text{cm}^{-1}$ | wave functions                                                                                                              |
|----------|--------------------|-----------------------------------------------------------------------------------------------------------------------------|
| <b>1</b> | 0.0                | 99.2% $ \pm 15/2\rangle$                                                                                                    |
|          | 174.0              | 87.0% $ \pm 13/2\rangle$ +7.9% $ \pm 11/2\rangle$                                                                           |
|          | 223.5              | 34.1% $ \pm 11/2\rangle$ +28.3% $ \pm 9/2\rangle$ +20.5% $ \pm 7/2\rangle$ +7.0% $ \pm 1/2\rangle$ +6.6% $ \pm 3/2\rangle$  |
| <b>2</b> | 0.0                | 98.9% $ \pm 15/2\rangle$                                                                                                    |
|          | 148.8              | 63.8% $ \pm 13/2\rangle$ +26.0% $ \pm 11/2\rangle$ +7.4% $ \pm 9/2\rangle$                                                  |
|          | 201.0              | 32.3% $ \pm 3/2\rangle$ +29.0% $ \pm 5/2\rangle$ +17.0% $ \pm 1/2\rangle$ +11.4% $ \pm 7/2\rangle$                          |
| <b>3</b> | 0.0                | 100% $ \pm 15/2\rangle$                                                                                                     |
|          | 142.4              | 100% $ \pm 13/2\rangle$                                                                                                     |
|          | 271.3              | 99.9% $ \pm 1/2\rangle$                                                                                                     |
| <b>4</b> | 0.0                | 99.7% $ \pm 15/2\rangle$                                                                                                    |
|          | 164.3              | 71.2% $ \pm 13/2\rangle$ +22.1% $ \pm 11/2\rangle$                                                                          |
| <b>5</b> | 0.0                | 98.0% $ \pm 15/2\rangle$                                                                                                    |
|          | 158.9              | 71.6% $ \pm 13/2\rangle$ +14.1% $ \pm 11/2\rangle$ +6.3% $ \pm 7/2\rangle$                                                  |
| <b>6</b> | 0.0                | 100% $ \pm 15/2\rangle$                                                                                                     |
|          | 175.0              | 99.9% $ \pm 13/2\rangle$                                                                                                    |
|          | 219.4              | 99.7% $ \pm 1/2\rangle$                                                                                                     |
| <b>7</b> | 0.0                | 99.9% $ \pm 15/2\rangle$                                                                                                    |
|          | 109.7              | 42.4% $ \pm 5/2\rangle$ +20.3% $ \pm 3/2\rangle$ +19.2% $ \pm 7/2\rangle$ +12.7% $ \pm 9/2\rangle$                          |
|          | 127.4              | 26.2% $ \pm 7/2\rangle$ +25.5% $ \pm 3/2\rangle$ +21.0% $ \pm 9/2\rangle$ +15.3% $ \pm 5/2\rangle$ +7.8% $ \pm 11/2\rangle$ |
| <b>8</b> | 0.0                | 100% $ \pm 15/2\rangle$                                                                                                     |
|          | 159.7              | 99.5% $ \pm 13/2\rangle$                                                                                                    |
|          | 198.4              | 99.1% $ \pm 1/2\rangle$                                                                                                     |

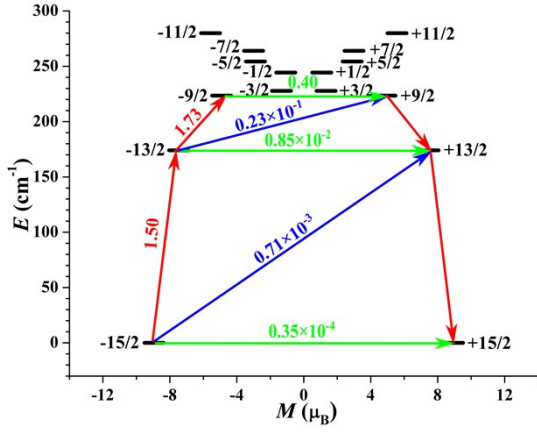

1

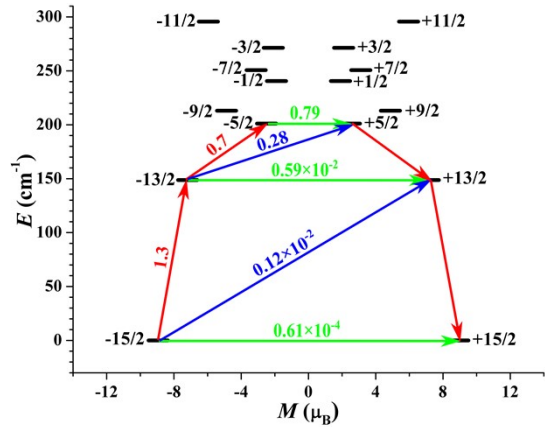

2

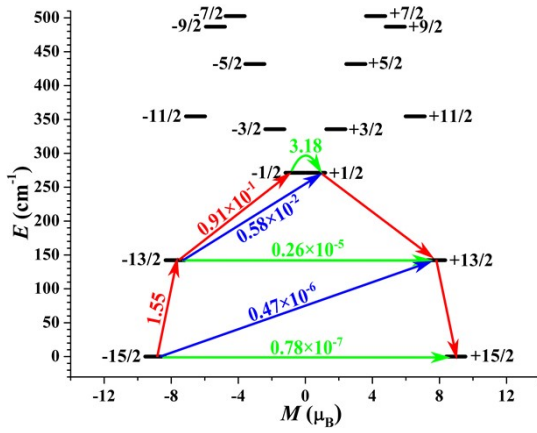

3

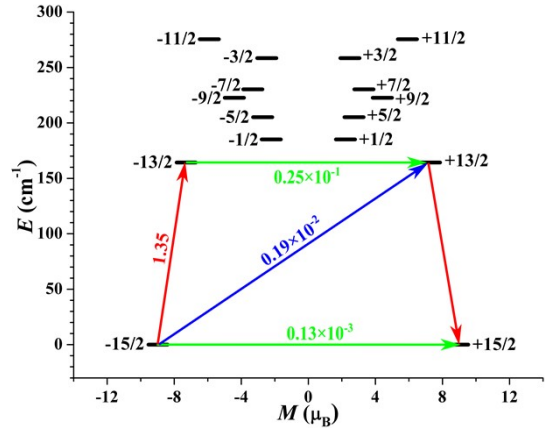

4

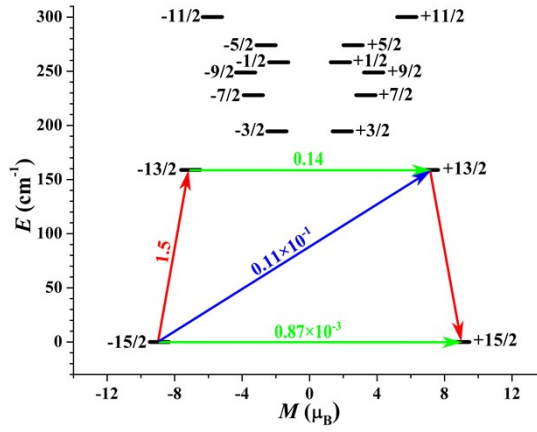

5

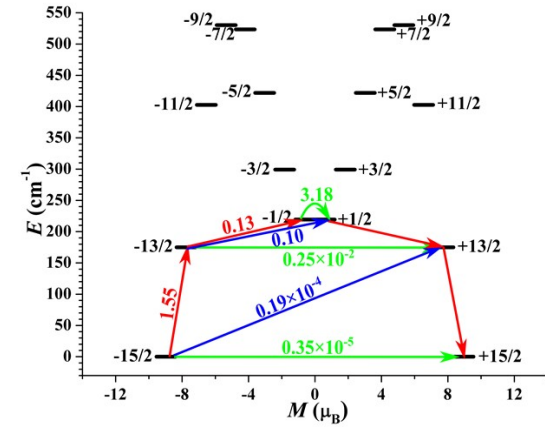

6

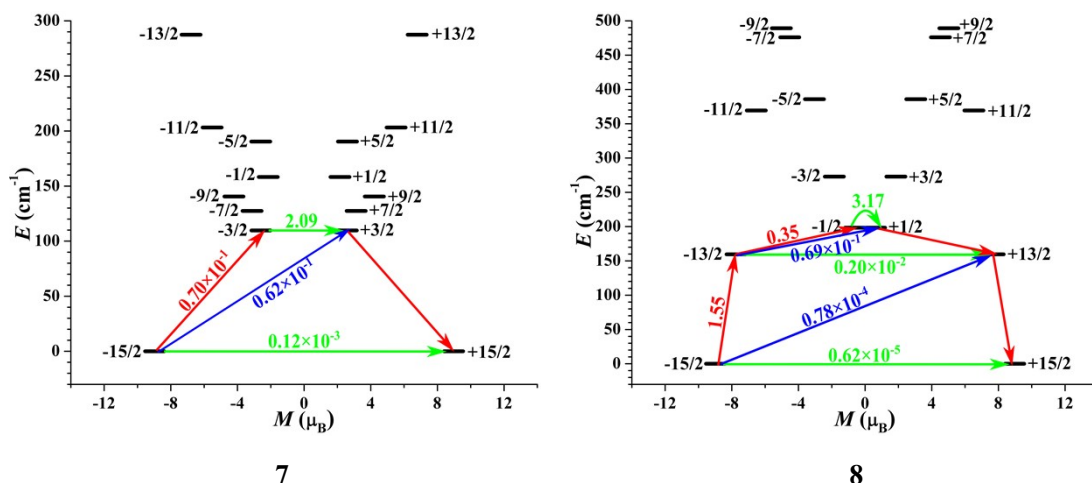

**Figure S1.** Magnetization blocking barriers in complexes 1–8. The thick black lines represent the KDs as a function of their magnetic moments along the magnetic axes. The green lines correspond to diagonal quantum tunneling of magnetization (QTM); the blue lines represent Orbach relaxation process. The path shown by the red arrows represents the most possibly path for magnetic relaxation in the corresponding compounds. The numbers at each arrow stand for the mean absolute value of the corresponding matrix element of transition magnetic moment.

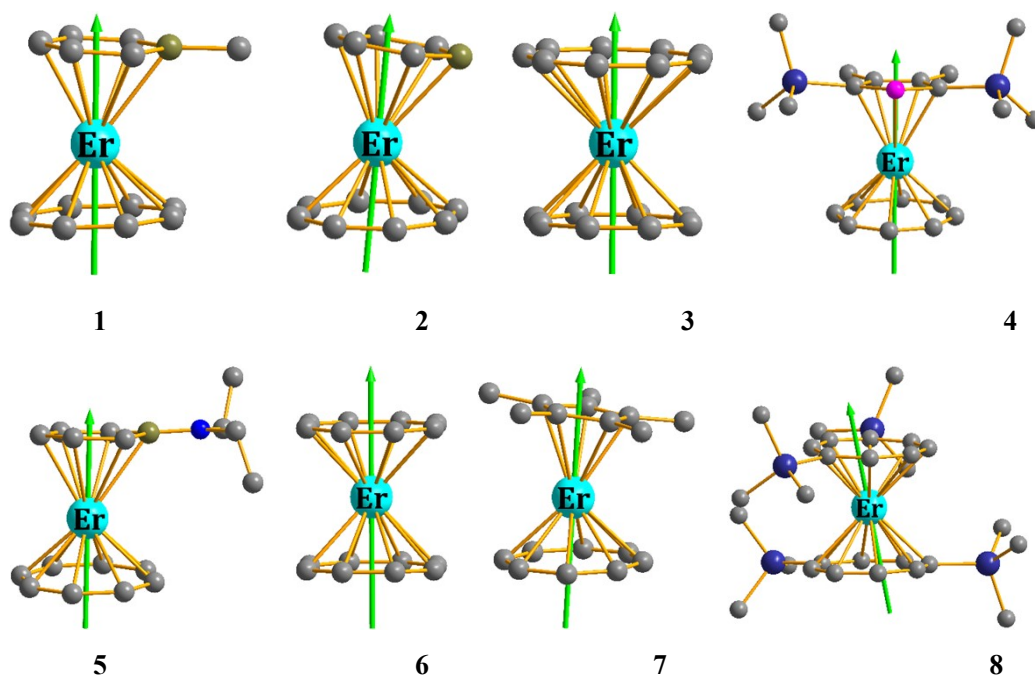

**Figure S2.** Calculated orientations of the local main magnetic axes on  $\text{Er}^{\text{III}}$  ions of complexes 1–8 in the ground KDs.

We have divided the basis sets used in complete-active-space self-consistent field (CASSCF) calculation into three categories: (1) The largest basis (L): ANO-RCC-VQZP for  $\text{Er}^{\text{III}}$  ion; ANO-RCC-VTZP for close C and B atoms; ANO-RCC-VDZ for distant atoms; (2) The medium basis (M): ANO-RCC-VTZP for  $\text{Er}^{\text{III}}$  ion; ANO-RCC-

VTZ for close C and B atoms; ANO-RCC-VDZ for distant atoms; (3) The smallest basis (S): ANO-RCC-VDZP for Er<sup>III</sup> ion; ANO-RCC-VDZP and VDZ for close C and P atoms, respectively; ANO-RCC-VDZ for distant atoms. Then, ORCA 5.0.1<sup>S2</sup> calculations were performed with CASSCF, followed by N-electron valence second-order perturbation theory (NEVPT2).<sup>S3-S6</sup> SARC2-DKH-QZVP basis set was used for Er<sup>III</sup>,<sup>S7</sup> and DKH-DEF2-TZVP<sup>S8,S9</sup> was for the other atoms. The NEVPT2 calculation with eleven 4f electrons in 7 active orbitals (CAS (11, 7)). In the calculations, the orbitals were determined for the average of 35  $S = 3/2$  and 112  $S = 1/2$  roots.

**Table S3.** Calculated energy levels (cm<sup>-1</sup>),  $\mathbf{g}$  ( $g_x$ ,  $g_y$ ,  $g_z$ ) tensors and predominant  $m_J$  values of the lowest eight KDs for **6** ([Er(COT)<sub>2</sub>]<sup>-</sup>) with dihedral angle ( $\varphi$ ) ranging from 0° to 25° using CASSCF/RASSI-SO with OpenMolcas.

| KDs | 0°    |                          |       | 5°    |                          |       | 10°   |                          |       |
|-----|-------|--------------------------|-------|-------|--------------------------|-------|-------|--------------------------|-------|
|     | $E$   | $\mathbf{g}$             | $m_J$ | $E$   | $\mathbf{g}$             | $m_J$ | $E$   | $\mathbf{g}$             | $m_J$ |
| 1   | 0.0   | 0.000<br>0.000<br>17.947 | ±15/2 | 0.0   | 0.000<br>0.000<br>17.946 | ±15/2 | 0.0   | 0.000<br>0.000<br>17.943 | ±15/2 |
| 2   | 175.0 | 0.007<br>0.008<br>15.523 | ±13/2 | 171.3 | 0.015<br>0.017<br>15.520 | ±13/2 | 160.1 | 0.071<br>0.074<br>15.479 | ±13/2 |
| 3   | 219.4 | 10.093<br>9.008<br>1.227 | ±1/2  | 217.3 | 9.839<br>9.249<br>1.235  | ±1/2  | 209.7 | 10.169<br>8.780<br>1.267 | ±1/2  |
| 4   | 299.3 | 0.481<br>0.609<br>3.652  | ±3/2  | 297.7 | 0.225<br>0.373<br>3.672  | ±3/2  | 292.1 | 0.472<br>0.841<br>3.697  | ±3/2  |
| 5   | 402.7 | 0.008<br>0.012<br>13.083 | ±11/2 | 399.2 | 0.004<br>0.008<br>13.070 | ±11/2 | 389.6 | 0.006<br>0.033<br>13.023 | ±11/2 |
| 6   | 422.0 | 0.289<br>0.432<br>6.058  | ±5/2  | 420.9 | 0.515<br>0.665<br>6.157  | ±5/2  | 416.8 | 1.197<br>1.576<br>6.357  | ±5/2  |
| 7   | 523.4 | 0.046<br>0.706<br>8.547  | ±7/2  | 510.7 | 0.343<br>0.541<br>11.482 | ±7/2  | 499.7 | 1.036<br>1.263<br>10.490 | ±7/2  |
| 8   | 530.2 | 0.330<br>0.405<br>10.819 | ±9/2  | 547.0 | 0.066<br>0.105<br>14.343 | ±9/2  | 567.6 | 0.139<br>0.186<br>15.087 | ±9/2  |
| KDs | 15°   |                          |       | 20°   |                          |       | 25°   |                          |       |
|     | $E$   | $\mathbf{g}$             | $m_J$ | $E$   | $\mathbf{g}$             | $m_J$ | $E$   | $\mathbf{g}$             | $m_J$ |

|   |       |                          |            |       |                          |            |       |                          |            |
|---|-------|--------------------------|------------|-------|--------------------------|------------|-------|--------------------------|------------|
| 1 | 0.0   | 0.002<br>0.003<br>17.929 | $\pm 15/2$ | 0.0   | 0.024<br>0.031<br>17.867 | $\pm 15/2$ | 0.0   | 0.067<br>0.175<br>16.715 | $\pm 15/2$ |
| 2 | 140.9 | 0.282<br>0.301<br>15.261 | $\pm 13/2$ | 110.5 | 1.092<br>1.444<br>13.952 | $\pm 13/2$ | 64.6  | 3.068<br>4.240<br>9.377  | $\pm 13/2$ |
| 3 | 191.5 | 11.337<br>6.995<br>1.367 | $\pm 1/2$  | 153.3 | 2.275<br>4.190<br>11.496 | $\pm 1/2$  | 107.9 | 8.626<br>5.431<br>0.930  | $\pm 11/2$ |
| 4 | 279.9 | 1.429<br>2.482<br>3.659  | $\pm 3/2$  | 256.0 | 4.565<br>3.200<br>1.755  | $\pm 3/2$  | 225.5 | 5.374<br>2.931<br>0.131  | $\pm 1/2$  |
| 5 | 376.4 | 0.024<br>0.165<br>12.760 | $\pm 11/2$ | 363.4 | 0.242<br>0.633<br>11.797 | $\pm 11/2$ | 356.9 | 0.814<br>1.920<br>9.523  | $\pm 9/2$  |
| 6 | 407.7 | 2.166<br>3.355<br>6.306  | $\pm 5/2$  | 388.3 | 5.997<br>5.414<br>2.900  | $\pm 5/2$  | 375.4 | 0.043<br>0.437<br>9.059  | $\pm 13/2$ |
| 7 | 491.7 | 2.292<br>2.629<br>9.961  | $\pm 7/2$  | 487.7 | 3.243<br>4.463<br>9.934  | $\pm 7/2$  | 509.3 | 9.885<br>6.422<br>2.897  | $\pm 5/2$  |
| 8 | 581.5 | 0.226<br>0.292<br>15.431 | $\pm 9/2$  | 580.4 | 0.360<br>0.440<br>15.399 | $\pm 9/2$  | 570.4 | 0.606<br>0.869<br>14.688 | $\pm 11/2$ |

**Table S4.** Wave functions with definite projection of the total moment  $|m_J\rangle$  for the lowest two or three KDs for 6 with  $\varphi$  ranging from  $0^\circ$  to  $25^\circ$ .

| $\varphi$  | $E/\text{cm}^{-1}$ | wave functions                                                                                                               |
|------------|--------------------|------------------------------------------------------------------------------------------------------------------------------|
| $0^\circ$  | 0.0                | 100% $ \pm 15/2\rangle$                                                                                                      |
|            | 175.0              | 99.9% $ \pm 13/2\rangle$                                                                                                     |
|            | 219.4              | 99.7% $ \pm 1/2\rangle$                                                                                                      |
| $5^\circ$  | 0.0                | 100% $ \pm 15/2\rangle$                                                                                                      |
|            | 171.3              | 99.6% $ \pm 13/2\rangle$                                                                                                     |
|            | 217.3              | 99.4% $ \pm 1/2\rangle$                                                                                                      |
| $10^\circ$ | 0.0                | 100% $ \pm 15/2\rangle$                                                                                                      |
|            | 160.1              | 98.7% $ \pm 13/2\rangle$                                                                                                     |
|            | 209.7              | 98.4% $ \pm 1/2\rangle$                                                                                                      |
| $15^\circ$ | 0.0                | 99.8% $ \pm 15/2\rangle$                                                                                                     |
|            | 140.9              | 96.1% $ \pm 13/2\rangle$                                                                                                     |
| $20^\circ$ | 0.0                | 99.2% $ \pm 15/2\rangle$                                                                                                     |
|            | 110.5              | 85.5% $ \pm 13/2\rangle$ +7.8% $ \pm 1/2\rangle$                                                                             |
| $25^\circ$ | 0.0                | 86.6% $ \pm 15/2\rangle$ +4.4% $ \pm 7/2\rangle$                                                                             |
|            | 64.6               | 31.5% $ \pm 13/2\rangle$ +24.2% $ \pm 5/2\rangle$ +17.1% $ \pm 3/2\rangle$ +12.2% $ \pm 11/2\rangle$ +6.1% $ \pm 9/2\rangle$ |

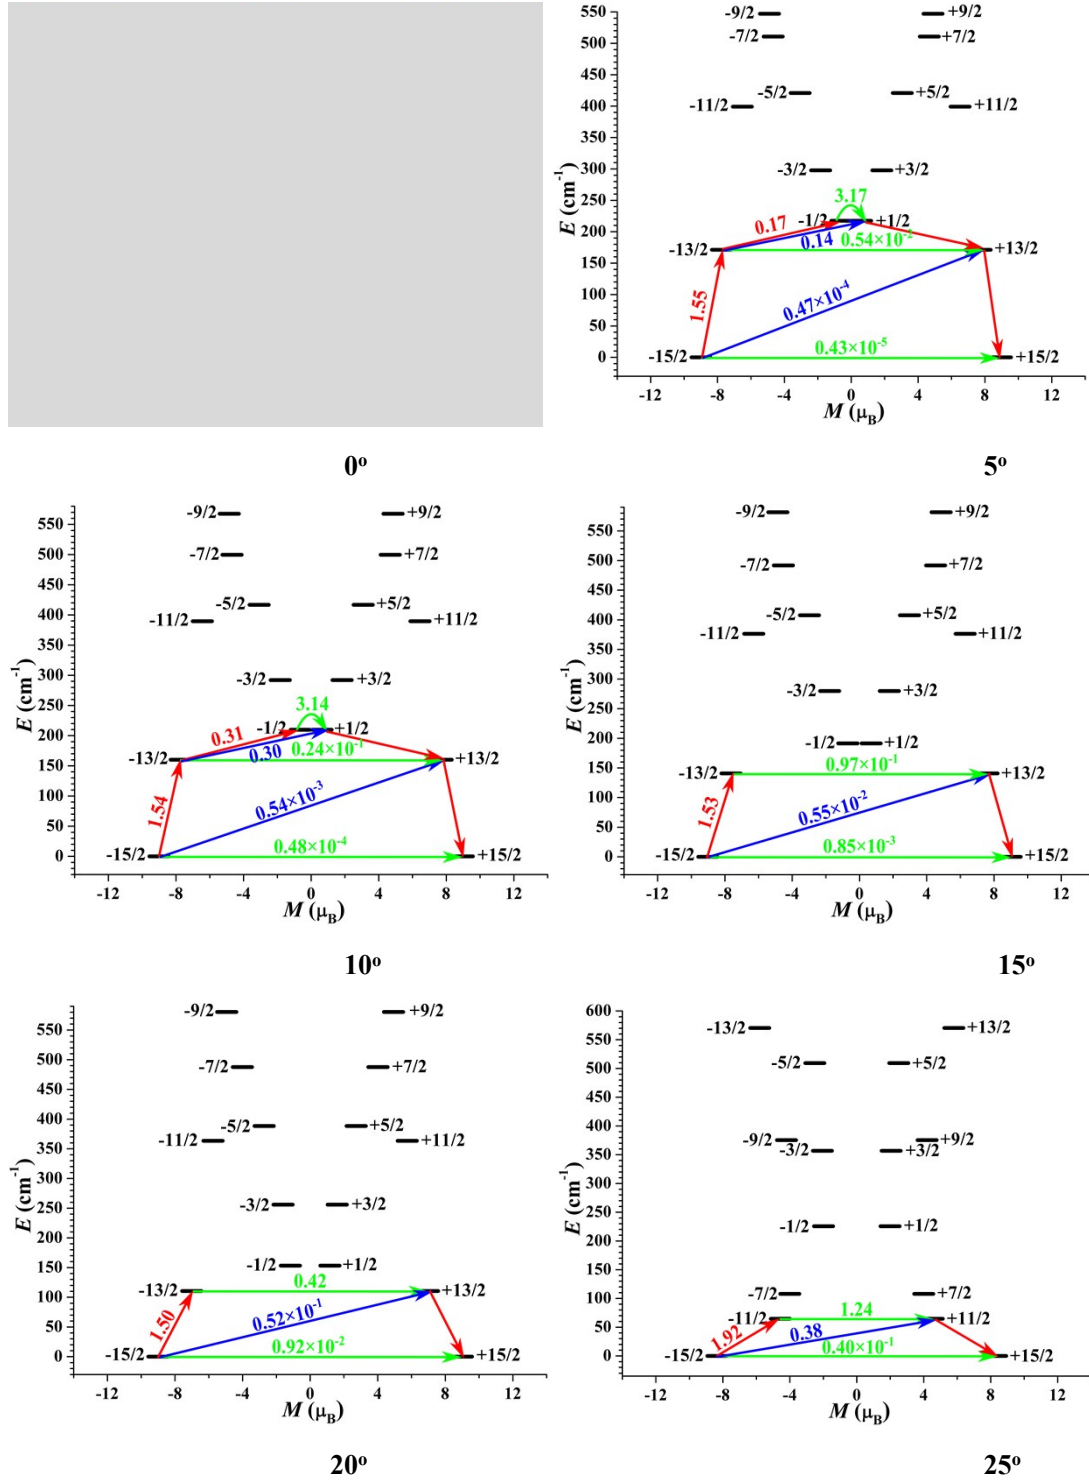

**Figure S3.** Magnetization blocking barriers for **6** with  $\varphi$  ranging from 0° to 25°. The thick black lines represent the KDs as a function of their magnetic moments along the magnetic axes. The green lines correspond to diagonal quantum tunneling of magnetization (QTM); the blue lines represent Orbach relaxation process. The path shown by the red arrows represents the most possibly path for magnetic relaxation in the corresponding compounds. The numbers at each arrow stand for the mean absolute value of the corresponding matrix element of transition magnetic moment.



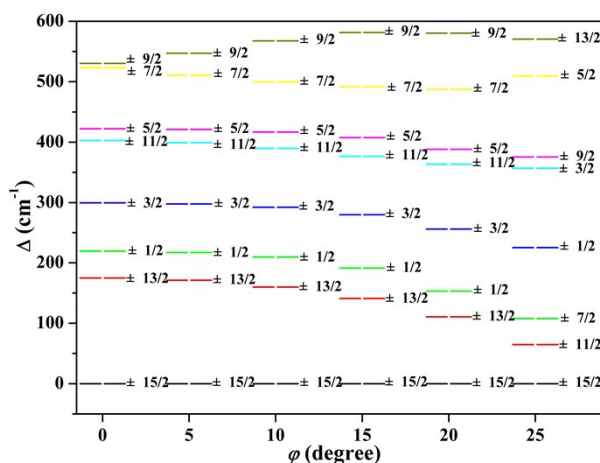

**Figure S4.** Splitting of the spin-orbit coupled ( $J$ ) ground state by the crystal field for **6**.

**Table S5.** Calculated crystal-field parameters  $B(k, q)$  and the corresponding weights for **6** with  $\phi$  ranging from  $0^\circ$  to  $25^\circ$ .

| $0^\circ$  |     |                        |            | $5^\circ$  |     |                        |            | $10^\circ$ |     |                        |            |
|------------|-----|------------------------|------------|------------|-----|------------------------|------------|------------|-----|------------------------|------------|
| $k$        | $q$ | $B(k, q)$              | weight (%) | $k$        | $q$ | $B(k, q)$              | Weight (%) | $k$        | $q$ | $B(k, q)$              | Weight (%) |
| 4          | 0   | $-0.12 \times 10^{-1}$ | 38.68      | 4          | 0   | $-0.12 \times 10^{-1}$ | 34.03      | 4          | 0   | $-0.12 \times 10^{-1}$ | 29.26      |
| 2          | 0   | $-0.17 \times 10^1$    | 29.31      | 2          | 0   | $-0.17 \times 10^1$    | 25.86      | 2          | 0   | $-0.17 \times 10^1$    | 22.26      |
| 6          | 0   | $0.66 \times 10^{-4}$  | 19.43      | 6          | 0   | $0.67 \times 10^{-4}$  | 17.42      | 6          | 0   | $0.71 \times 10^{-4}$  | 15.81      |
| 2          | 2   | $0.98 \times 10^{-1}$  | 1.68       | 2          | -1  | 0.26                   | 3.96       | 2          | -1  | 0.58                   | 7.61       |
| $15^\circ$ |     |                        |            | $20^\circ$ |     |                        |            | $25^\circ$ |     |                        |            |
| $k$        | $q$ | $B(k, q)$              | Weight (%) | $k$        | $q$ | $B(k, q)$              | Weight (%) | $k$        | $q$ | $B(k, q)$              | Weight (%) |
| 4          | 0   | $-0.12 \times 10^{-1}$ | 25.91      | 4          | 0   | $-0.12 \times 10^{-1}$ | 22.13      | 4          | -1  | $0.14 \times 10^{-1}$  | 14.52      |
| 2          | 0   | $-0.17 \times 10^1$    | 19.28      | 2          | 0   | $-0.15 \times 10^1$    | 15.06      | 6          | -1  | $-0.14 \times 10^{-3}$ | 14.21      |
| 6          | 0   | $0.77 \times 10^{-4}$  | 15.14      | 6          | 0   | $0.82 \times 10^{-4}$  | 13.69      | 4          | 0   | $-0.72 \times 10^{-2}$ | 7.69       |
| 2          | -1  | -0.84                  | 9.68       | 2          | -1  | -0.91                  | 8.97       | 2          | -1  | 0.11                   | 6.76       |

**Table S6** Included  $\theta$  (degree) angles for compound **6**.

|                          |              |                          |              |                          |              |                          |              |
|--------------------------|--------------|--------------------------|--------------|--------------------------|--------------|--------------------------|--------------|
| $\angle C_1$ -Er-axis    | $43.8^\circ$ | $\angle C_2$ -Er-axis    | $43.9^\circ$ | $\angle C_3$ -Er-axis    | $44.4^\circ$ | $\angle C_4$ -Er-axis    | $44.4^\circ$ |
| $\angle C_5$ -Er-axis    | $44.3^\circ$ | $\angle C_6$ -Er-axis    | $44.4^\circ$ | $\angle C_7$ -Er-axis    | $44.7^\circ$ | $\angle C_8$ -Er-axis    | $44.4^\circ$ |
| $\angle C_9$ -Er-axis    | $44.4^\circ$ | $\angle C_{10}$ -Er-axis | $43.8^\circ$ | $\angle C_{11}$ -Er-axis | $43.9^\circ$ | $\angle C_{12}$ -Er-axis | $44.3^\circ$ |
| $\angle C_{13}$ -Er-axis | $44.4^\circ$ | $\angle C_{14}$ -Er-axis | $44.3^\circ$ | $\angle C_{15}$ -Er-axis | $44.5^\circ$ | $\angle C_{16}$ -Er-axis | $44.7^\circ$ |
| $\angle$ Average         | $44.3^\circ$ |                          |              |                          |              |                          |              |

**Table S7.** Calculated energy levels ( $\text{cm}^{-1}$ ),  $\mathbf{g}$  ( $g_x, g_y, g_z$ ) tensors and predominant  $m_J$  values of the lowest eight KDs for **6** with different included  $\theta$  angle (change the  $\theta$  angles on the one side of COT ligands) keeping the Er-C bond lengths fixed using CASSCF/RASSI-SO with OpenMolcas.

| $\theta$ | $36.3^\circ$ |              |            | $38.3^\circ$ |              |            | $40.3^\circ$ |              |            |
|----------|--------------|--------------|------------|--------------|--------------|------------|--------------|--------------|------------|
|          | $E$          | $\mathbf{g}$ | $m_J$      | $E$          | $\mathbf{g}$ | $m_J$      | $E$          | $\mathbf{g}$ | $m_J$      |
| 1        | 0.0          | 0.000        | $\pm 15/2$ | 0.0          | 0.000        | $\pm 15/2$ | 0.0          | 0.000        | $\pm 15/2$ |

|          |              |                          |                      |              |                          |                      |              |                          |                      |
|----------|--------------|--------------------------|----------------------|--------------|--------------------------|----------------------|--------------|--------------------------|----------------------|
|          |              | 0.000<br>17.950          |                      |              | 0.000<br>17.949          |                      |              | 0.000<br>17.949          |                      |
| 2        | 237.9        | 5.090<br>6.165<br>7.609  | $\pm 1/2$            | 225.9        | 0.082<br>0.094<br>15.397 | $\pm 13/2$           | 210.3        | 0.021<br>0.023<br>15.497 | $\pm 13/2$           |
| 3        | 239.6        | 2.514<br>2.998<br>11.293 | $\pm 13/2$           | 235.0        | 10.240<br>8.687<br>1.334 | $\pm 1/2$            | 230.6        | 10.228<br>8.838<br>1.243 | $\pm 1/2$            |
| 4        | 303.8        | 0.796<br>0.973<br>3.640  | $\pm 3/2$            | 303.8        | 0.710<br>0.868<br>3.643  | $\pm 3/2$            | 303.1        | 0.627<br>0.772<br>3.646  | $\pm 3/2$            |
| 5        | 406.7        | 0.209<br>0.401<br>6.043  | $\pm 5/2$            | 411.6        | 0.238<br>0.408<br>6.051  | $\pm 5/2$            | 415.9        | 0.282<br>0.431<br>6.103  | $\pm 5/2$            |
| 6        | 437.1        | 0.011<br>0.014<br>13.078 | $\pm 11/2$           | 431.3        | 0.013<br>0.018<br>13.078 | $\pm 11/2$           | 423.5        | 0.030<br>0.038<br>13.027 | $\pm 11/2$           |
| 7        | 499.7        | 0.226<br>0.350<br>8.449  | $\pm 7/2$            | 506.9        | 0.216<br>0.385<br>8.443  | $\pm 7/2$            | 513.6        | 0.192<br>0.436<br>8.444  | $\pm 7/2$            |
| 8        | 523.8        | 0.055<br>0.064<br>10.768 | $\pm 9/2$            | 527.4        | 0.073<br>0.088<br>10.763 | $\pm 9/2$            | 529.7        | 0.106<br>0.129<br>10.762 | $\pm 9/2$            |
| $\theta$ | <b>42.3°</b> |                          |                      | <b>43.3°</b> |                          |                      | <b>44.3°</b> |                          |                      |
| KDs      | <i>E</i>     | <i>g</i>                 | <i>m<sub>J</sub></i> | <i>E</i>     | <i>g</i>                 | <i>m<sub>J</sub></i> | <i>E</i>     | <i>g</i>                 | <i>m<sub>J</sub></i> |
| 1        | 0.0          | 0.000<br>0.000<br>17.948 | $\pm 15/2$           | 0.0          | 0.000<br>0.000<br>17.947 | $\pm 15/2$           | 0.0          | 0.000<br>0.000<br>17.947 | $\pm 15/2$           |
| 2        | 193.1        | 0.011<br>0.012<br>15.516 | $\pm 13/2$           | 184.1        | 0.008<br>0.009<br>15.520 | $\pm 13/2$           | 175.0        | 0.007<br>0.008<br>15.523 | $\pm 13/2$           |
| 3        | 225.4        | 10.160<br>8.932<br>1.230 | $\pm 1/2$            | 222.5        | 10.127<br>8.971<br>1.228 | $\pm 1/2$            | 219.4        | 10.094<br>9.007<br>1.227 | $\pm 1/2$            |
| 4        | 301.6        | 0.549<br>0.683<br>3.649  | $\pm 3/2$            | 300.6        | 0.515<br>0.646<br>3.651  | $\pm 3/2$            | 299.3        | 0.482<br>0.609<br>3.652  | $\pm 3/2$            |
| 5        | 413.7        | 0.026<br>0.047<br>12.997 | $\pm 11/2$           | 408.3        | 0.013<br>0.020<br>13.072 | $\pm 11/2$           | 402.7        | 0.008<br>0.012<br>13.083 | $\pm 11/2$           |
| 6        | 419.6        | 0.229<br>0.384<br>6.131  | $\pm 5/2$            | 420.9        | 0.268<br>0.415<br>6.067  | $\pm 5/2$            | 422.0        | 0.289<br>0.432<br>6.058  | $\pm 5/2$            |
| 7        | 519.2        | 0.131                    | $\pm 7/2$            | 521.5        | 0.067                    | $\pm 7/2$            | 523.4        | 0.046                    | $\pm 7/2$            |

|                 |              |                          |                      |              |                          |                      |              |                          |                      |
|-----------------|--------------|--------------------------|----------------------|--------------|--------------------------|----------------------|--------------|--------------------------|----------------------|
|                 |              | 0.521<br>8.462           |                      |              | 0.593<br>8.487           |                      |              | 0.706<br>8.545           |                      |
| 8               | 530.7        | 0.170<br>0.208<br>10.770 | $\pm 9/2$            | 530.6        | 0.230<br>0.282<br>10.784 | $\pm 9/2$            | 530.2        | 0.330<br>0.405<br>10.818 | $\pm 9/2$            |
| $\theta$<br>KDs | <b>45.3°</b> |                          |                      | <b>46.3°</b> |                          |                      | <b>48.3°</b> |                          |                      |
|                 | <i>E</i>     | <i>g</i>                 | <i>m<sub>J</sub></i> | <i>E</i>     | <i>g</i>                 | <i>m<sub>J</sub></i> | <i>E</i>     | <i>g</i>                 | <i>m<sub>J</sub></i> |
| 1               | 0.0          | 0.000<br>0.000<br>17.946 | $\pm 15/2$           | 0.0          | 0.000<br>0.000<br>17.946 | $\pm 15/2$           | 0.0          | 0.000<br>0.000<br>17.945 | $\pm 15/2$           |
| 2               | 165.8        | 0.006<br>0.007<br>15.526 | $\pm 13/2$           | 156.8        | 0.006<br>0.006<br>15.528 | $\pm 13/2$           | 139.5        | 0.005<br>0.005<br>15.531 | $\pm 13/2$           |
| 3               | 216.4        | 10.063<br>9.041<br>1.227 | $\pm 1/2$            | 213.3        | 10.035<br>9.071<br>1.227 | $\pm 1/2$            | 207.2        | 9.985<br>9.122<br>1.227  | $\pm 1/2$            |
| 4               | 297.8        | 0.451<br>0.576<br>3.654  | $\pm 3/2$            | 296.3        | 0.423<br>0.546<br>3.655  | $\pm 3/2$            | 292.8        | 0.373<br>0.495<br>3.658  | $\pm 3/2$            |
| 5               | 396.8        | 0.006<br>0.009<br>13.086 | $\pm 11/2$           | 390.7        | 0.005<br>0.007<br>13.087 | $\pm 11/2$           | 378.4        | 0.003<br>0.005<br>13.086 | $\pm 11/2$           |
| 6               | 422.7        | 0.307<br>0.448<br>6.057  | $\pm 5/2$            | 423.1        | 0.324<br>0.463<br>6.057  | $\pm 5/2$            | 423.0        | 0.359<br>0.497<br>6.058  | $\pm 5/2$            |
| 7               | 524.9        | 0.277<br>0.925<br>8.718  | $\pm 7/2$            | 525.9        | 0.767<br>1.510<br>9.555  | $\pm 7/2$            | 524.1        | 1.033<br>1.220<br>11.029 | $\pm 9/2$            |
| 8               | 529.3        | 0.537<br>0.648<br>10.919 | $\pm 9/2$            | 528.1        | 1.080<br>1.228<br>11.410 | $\pm 9/2$            | 526.9        | 0.596<br>1.512<br>9.058  | $\pm 7/2$            |
| $\theta$<br>KDs | <b>50.3°</b> |                          |                      | <b>52.3°</b> |                          |                      | <b>54.3°</b> |                          |                      |
|                 | <i>E</i>     | <i>g</i>                 | <i>m<sub>J</sub></i> | <i>E</i>     | <i>g</i>                 | <i>m<sub>J</sub></i> | <i>E</i>     | <i>g</i>                 | <i>m<sub>J</sub></i> |
| 1               | 0.0          | 0.000<br>0.000<br>17.944 | $\pm 15/2$           | 0.0          | 0.000<br>0.000<br>17.943 | $\pm 15/2$           | 0.0          | 0.000<br>0.000<br>17.942 | $\pm 15/2$           |
| 2               | 123.8        | 0.005<br>0.005<br>15.532 | $\pm 13/2$           | 110.1        | 0.005<br>0.005<br>15.533 | $\pm 13/2$           | 99.2         | 0.005<br>0.005<br>15.533 | $\pm 13/2$           |
| 3               | 201.6        | 9.945<br>9.162<br>1.228  | $\pm 1/2$            | 197.0        | 9.914<br>9.192<br>1.228  | $\pm 1/2$            | 193.7        | 9.892<br>9.212<br>1.229  | $\pm 1/2$            |
| 4               | 289.2        | 0.332<br>0.455           | $\pm 3/2$            | 285.7        | 0.301<br>0.427           | $\pm 3/2$            | 282.5        | 0.278<br>0.409           | $\pm 3/2$            |

|   |       |                          |            |       |                          |            |       |                          |            |
|---|-------|--------------------------|------------|-------|--------------------------|------------|-------|--------------------------|------------|
|   |       | 3.660                    |            |       | 3.661                    |            |       | 3.662                    |            |
| 5 | 366.1 | 0.002<br>0.005<br>13.084 | $\pm 11/2$ | 354.4 | 0.001<br>0.005<br>13.081 | $\pm 11/2$ | 343.5 | 0.001<br>0.006<br>13.077 | $\pm 11/2$ |
| 6 | 421.7 | 0.396<br>0.537<br>6.060  | $\pm 5/2$  | 419.3 | 0.436<br>0.584<br>6.061  | $\pm 5/2$  | 415.9 | 0.482<br>0.639<br>6.062  | $\pm 5/2$  |
| 7 | 519.1 | 0.490<br>0.625<br>10.736 | $\pm 9/2$  | 512.8 | 0.363<br>0.473<br>10.701 | $\pm 9/2$  | 505.2 | 0.318<br>0.420<br>10.687 | $\pm 9/2$  |
| 8 | 525.9 | 0.011<br>1.066<br>8.481  | $\pm 7/2$  | 523.0 | 0.162<br>0.966<br>8.414  | $\pm 7/2$  | 518.3 | 0.260<br>0.964<br>8.391  | $\pm 7/2$  |

**Table S8.** Wave functions with definite projection of the total moment  $|m_J\rangle$  for the lowest two or three KDs of **6** with different included  $\theta$  angle (change the  $\theta$  angles on the one side of COT ligands) keeping the Er-C bond lengths fixed.

| $\theta$     | $E/\text{cm}^{-1}$ | wave functions                                    |
|--------------|--------------------|---------------------------------------------------|
| <b>36.3°</b> | 0.0                | 100% $ \pm 15/2\rangle$                           |
|              | 237.9              | 70.2% $ \pm 1/2\rangle$ +29.5% $ \pm 13/2\rangle$ |
| <b>38.3°</b> | 0.0                | 100% $ \pm 15/2\rangle$                           |
|              | 225.9              | 99.0% $ \pm 13/2\rangle$                          |
|              | 235.0              | 98.8% $ \pm 1/2\rangle$                           |
| <b>40.3°</b> | 0.0                | 100% $ \pm 15/2\rangle$                           |
|              | 210.3              | 99.7% $ \pm 13/2\rangle$                          |
|              | 230.6              | 99.5% $ \pm 1/2\rangle$                           |
| <b>42.3°</b> | 0.0                | 100% $ \pm 15/2\rangle$                           |
|              | 193.1              | 99.8% $ \pm 13/2\rangle$                          |
|              | 225.4              | 99.7% $ \pm 1/2\rangle$                           |
| <b>43.3°</b> | 0.0                | 100% $ \pm 15/2\rangle$                           |
|              | 184.1              | 99.9% $ \pm 13/2\rangle$                          |
|              | 222.5              | 99.7% $ \pm 1/2\rangle$                           |
| <b>44.3°</b> | 0.0                | 100% $ \pm 15/2\rangle$                           |
|              | 175.0              | 99.9% $ \pm 13/2\rangle$                          |
|              | 219.4              | 99.7% $ \pm 1/2\rangle$                           |
| <b>45.3°</b> | 0.0                | 100% $ \pm 15/2\rangle$                           |
|              | 165.8              | 99.9% $ \pm 13/2\rangle$                          |
|              | 216.4              | 99.7% $ \pm 1/2\rangle$                           |
| <b>46.3°</b> | 0.0                | 100% $ \pm 15/2\rangle$                           |
|              | 156.8              | 99.9% $ \pm 13/2\rangle$                          |
|              | 213.3              | 99.7% $ \pm 1/2\rangle$                           |
| <b>48.3°</b> | 0.0                | 100% $ \pm 15/2\rangle$                           |
|              | 139.5              | 99.9% $ \pm 13/2\rangle$                          |

|              |       |                          |
|--------------|-------|--------------------------|
|              | 207.2 | 99.8% $ \pm 1/2\rangle$  |
| <b>50.3°</b> | 0.0   | 100% $ \pm 15/2\rangle$  |
|              | 123.8 | 99.9% $ \pm 13/2\rangle$ |
|              | 201.6 | 99.7% $ \pm 1/2\rangle$  |
|              | 0.0   | 100% $ \pm 15/2\rangle$  |
| <b>52.3°</b> | 110.1 | 99.9% $ \pm 13/2\rangle$ |
|              | 197.0 | 99.7% $ \pm 1/2\rangle$  |
|              | 0.0   | 100% $ \pm 15/2\rangle$  |
| <b>54.3°</b> | 99.2  | 99.9% $ \pm 13/2\rangle$ |
|              | 193.7 | 99.7% $ \pm 1/2\rangle$  |
|              |       |                          |

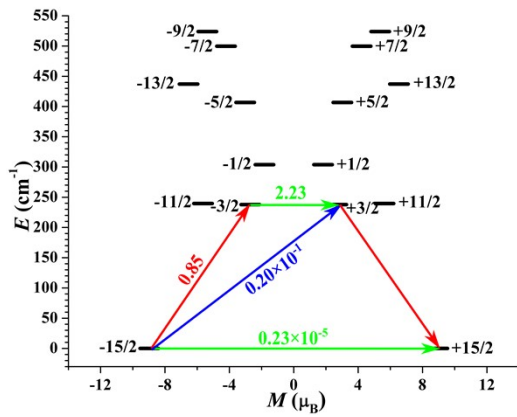

36.3°

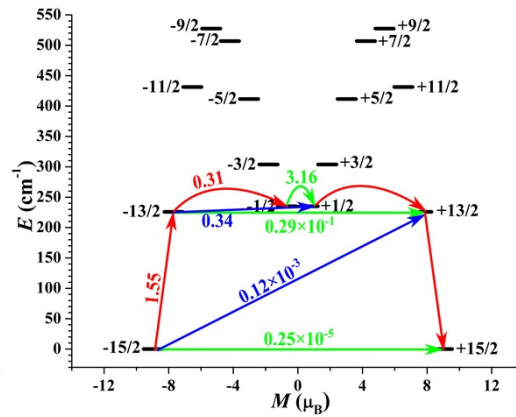

38.3°

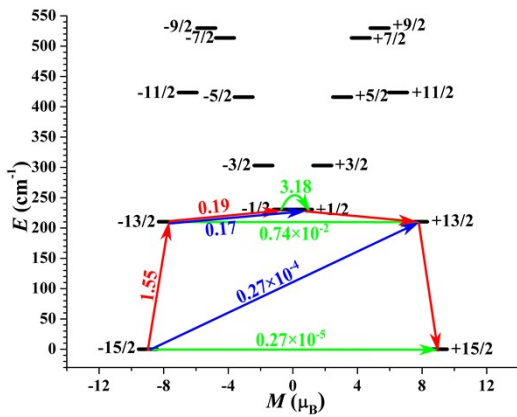

40.3°

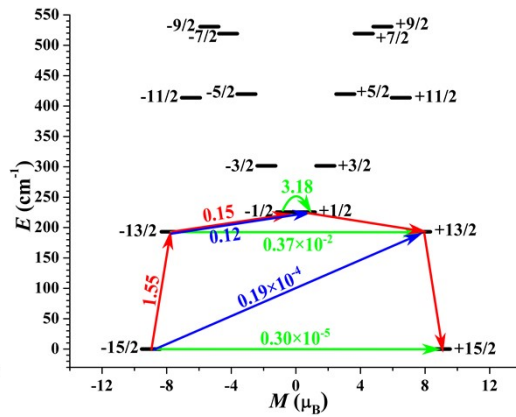

42.3°

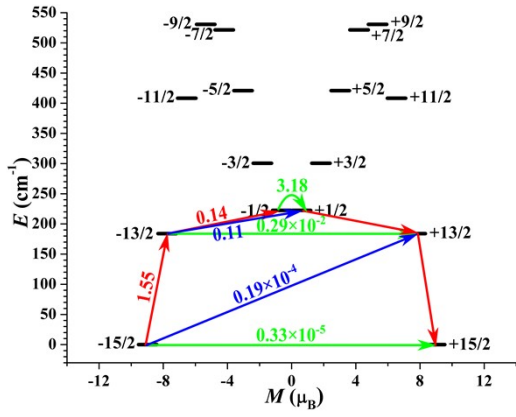

43.3°

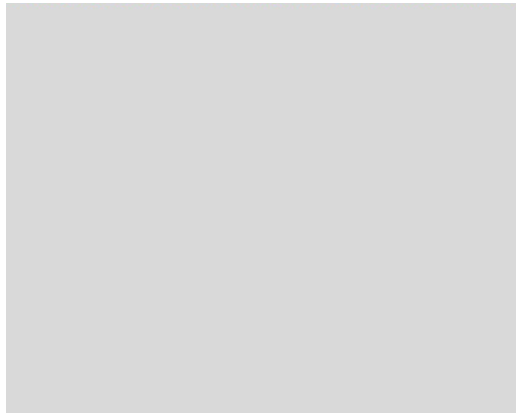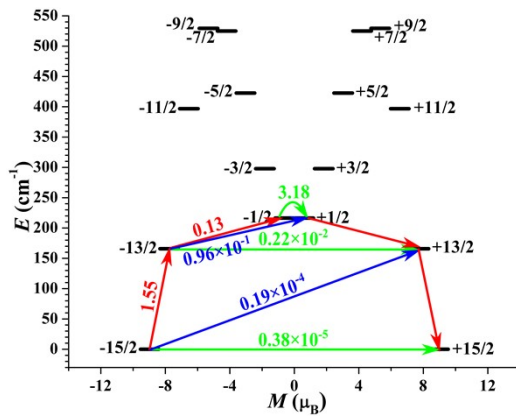

45.3°

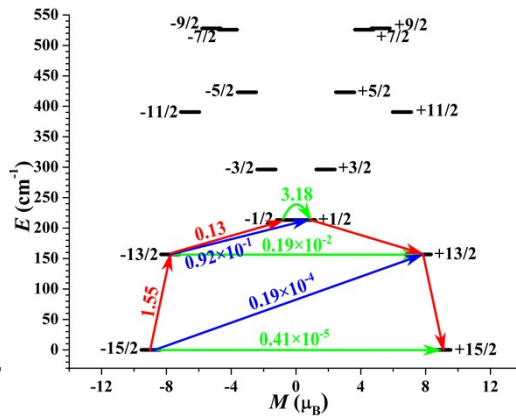

44.3°

46.3°

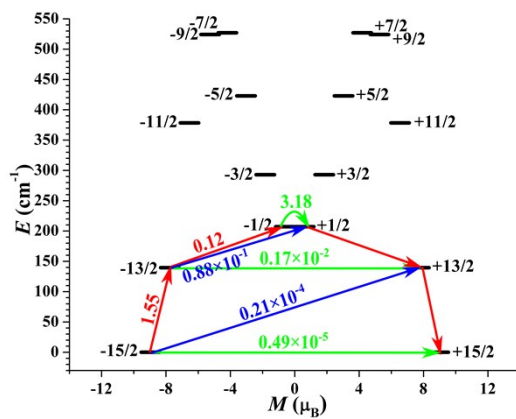

48.3°

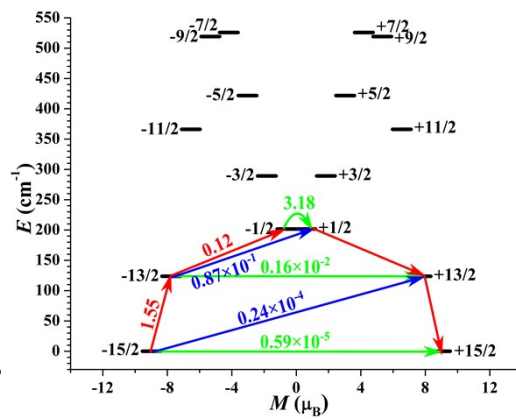

50.3°

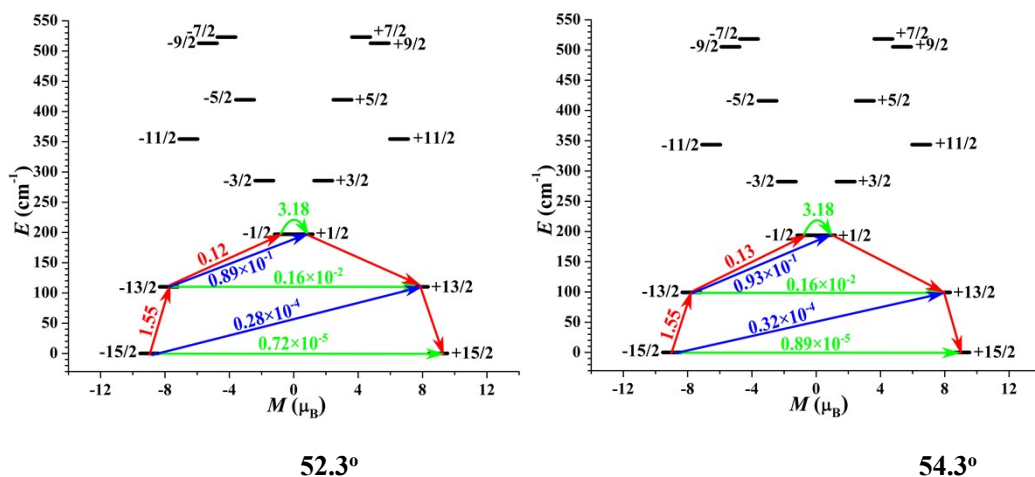

**Figure S5.** Magnetization blocking barriers for **6** with different included  $\theta$  angle (changing  $\theta$  on one side of COT ligands) fixing the Er-C bond lengths. The thick black lines represent the KDs as a function of their magnetic moments along the magnetic axes. The green lines correspond to diagonal quantum tunneling of magnetization (QTM); the blue lines represent Orbach relaxation process. The path shown by the red arrows represents the most possibly path for magnetic relaxation in the corresponding compounds. The numbers at each arrow stand for the mean absolute value of the corresponding matrix element of transition magnetic moment.

**Table S9.** Average C-C bond lengths ( $\text{\AA}$ ) of one COT ligand with different  $\theta$  angle.

| $\theta$ | 36.3° | 38.3° | 40.3° | 42.3° | 44.3° | 46.3° | 48.3° | 50.3° | 52.3° | 54.3° |
|----------|-------|-------|-------|-------|-------|-------|-------|-------|-------|-------|
| C-C      | 1.186 | 1.242 | 1.296 | 1.349 | 1.400 | 1.449 | 1.496 | 1.542 | 1.586 | 1.627 |

**Table S10.** Calculated crystal-field parameters  $B(k, q)$  and the corresponding weights for **6** with different included  $\theta$  angle (changing the  $\theta$  angles on one side of COT) keeping the Er-C bond lengths unchanged.

| 36.3° |     |                        |            | 38.3° |     |                        |            | 40.3° |     |                        |            |
|-------|-----|------------------------|------------|-------|-----|------------------------|------------|-------|-----|------------------------|------------|
| $k$   | $q$ | $B(k, q)$              | Weight (%) | $k$   | $q$ | $B(k, q)$              | Weight (%) | $k$   | $q$ | $B(k, q)$              | Weight (%) |
| 4     | 0   | $-0.13 \times 10^{-1}$ | 44.80      | 4     | 0   | $-0.13 \times 10^{-1}$ | 43.41      | 4     | 0   | $-0.13 \times 10^{-1}$ | 41.87      |
| 2     | 0   | $-0.15 \times 10^1$    | 29.15      | 2     | 0   | $-0.16 \times 10^1$    | 29.21      | 2     | 0   | $-0.16 \times 10^1$    | 29.26      |
| 6     | 0   | $0.41 \times 10^{-4}$  | 13.49      | 6     | 0   | $0.47 \times 10^{-4}$  | 14.94      | 6     | 0   | $0.53 \times 10^{-4}$  | 16.47      |
| 2     | 2   | 0.12                   | 2.24       | 2     | 2   | 0.11                   | 2.13       | 2     | 2   | 0.11                   | 2.02       |
| 42.3° |     |                        |            | 43.3° |     |                        |            | 44.3° |     |                        |            |
| $k$   | $q$ | $B(k, q)$              | Weight (%) | $k$   | $q$ | $B(k, q)$              | Weight (%) | $k$   | $q$ | $B(k, q)$              | Weight (%) |
| 4     | 0   | $-0.13 \times 10^{-1}$ | 40.31      | 4     | 0   | $-0.12 \times 10^{-1}$ | 39.51      | 4     | 0   | $-0.12 \times 10^{-1}$ | 38.68      |
| 2     | 0   | $-0.17 \times 10^1$    | 29.34      | 2     | 0   | $-0.17 \times 10^1$    | 29.35      | 2     | 0   | $-0.17 \times 10^1$    | 29.32      |
| 6     | 0   | $0.60 \times 10^{-4}$  | 18.01      | 6     | 0   | $0.63 \times 10^{-4}$  | 18.75      | 6     | 0   | $0.66 \times 10^{-4}$  | 19.43      |
| 2     | 2   | 0.10                   | 1.83       | 2     | 2   | 0.10                   | 1.79       | 2     | 2   | $0.98 \times 10^{-1}$  | 1.68       |
| 45.3° |     |                        |            | 46.3° |     |                        |            | 48.3° |     |                        |            |

| $k$          | $q$ | $B(k, q)$              | Weight (%) | $k$          | $q$ | $B(k, q)$              | Weight (%) | $k$          | $q$ | $B(k, q)$              | Weight (%) |
|--------------|-----|------------------------|------------|--------------|-----|------------------------|------------|--------------|-----|------------------------|------------|
| 4            | 0   | $-0.12 \times 10^{-1}$ | 37.81      | 4            | 0   | $-0.12 \times 10^{-1}$ | 36.96      | 4            | 0   | $-0.12 \times 10^{-1}$ | 35.47      |
| 2            | 0   | $-0.17 \times 10^1$    | 29.24      | 2            | 0   | $-0.17 \times 10^1$    | 29.16      | 2            | 0   | $-0.18 \times 10^1$    | 29.10      |
| 6            | 0   | $0.69 \times 10^{-4}$  | 20.05      | 6            | 0   | $0.72 \times 10^{-4}$  | 20.63      | 6            | 0   | $0.78 \times 10^{-4}$  | 21.70      |
| 2            | -2  | -0.10                  | 1.72       | 2            | -2  | -0.11                  | 1.79       | 2            | -2  | -0.12                  | 1.95       |
| <b>50.3°</b> |     |                        |            | <b>52.3°</b> |     |                        |            | <b>54.3°</b> |     |                        |            |
| $k$          | $q$ | $B(k, q)$              | Weight (%) | $k$          | $q$ | $B(k, q)$              | Weight (%) | $k$          | $q$ | $B(k, q)$              | Weight (%) |
| 4            | 0   | $-0.12 \times 10^{-1}$ | 34.42      | 4            | 0   | $-0.11 \times 10^{-1}$ | 33.41      | 4            | 0   | $-0.11 \times 10^{-1}$ | 32.60      |
| 2            | 0   | $-0.18 \times 10^1$    | 29.31      | 2            | 0   | $-0.18 \times 10^1$    | 29.47      | 2            | 0   | $-0.18 \times 10^1$    | 29.73      |
| 6            | 0   | $0.82 \times 10^{-4}$  | 22.77      | 6            | 0   | $0.85 \times 10^{-4}$  | 23.55      | 6            | 0   | $0.87 \times 10^{-4}$  | 24.14      |
| 2            | -2  | -0.13                  | 2.12       | 2            | -2  | -0.14                  | 2.20       | 2            | -2  | -0.14                  | 2.20       |

**Table S11.** Calculated energy levels ( $\text{cm}^{-1}$ ),  $\mathbf{g}$  ( $g_x, g_y, g_z$ ) tensors and predominant  $m_J$  values of the lowest eight KDs for **6** with different  $\theta$  angles (changing the  $\theta$  angles on the two sides of COT ligands simultaneously) fixing the Er-C bond lengths using CASSCF/RASSI-SO with OpenMolcas.

| $\theta$<br>KDs | <b>36.3°</b> |                          |            | <b>38.3°</b> |                          |            | <b>40.3°</b> |                          |            |
|-----------------|--------------|--------------------------|------------|--------------|--------------------------|------------|--------------|--------------------------|------------|
|                 | $E$          | $\mathbf{g}$             | $m_J$      | $E$          | $\mathbf{g}$             | $m_J$      | $E$          | $\mathbf{g}$             | $m_J$      |
| 1               | 0.0          | 0.000<br>0.000<br>17.953 | $\pm 15/2$ | 0.0          | 0.000<br>0.000<br>17.952 | $\pm 15/2$ | 0.0          | 0.000<br>0.000<br>17.950 | $\pm 15/2$ |
| 2               | 242.6        | 10.942<br>8.133<br>1.191 | $\pm 1/2$  | 240.9        | 10.668<br>8.422<br>1.206 | $\pm 1/2$  | 236.9        | 10.332<br>8.564<br>1.371 | $\pm 1/2$  |
| 3               | 294.7        | 0.981<br>1.169<br>6.532  | $\pm 5/2$  | 273.1        | 0.008<br>0.010<br>15.476 | $\pm 13/2$ | 244.0        | 0.098<br>0.118<br>15.346 | $\pm 13/2$ |
| 4               | 297.9        | 0.303<br>0.359<br>12.586 | $\pm 13/2$ | 300.0        | 1.018<br>1.212<br>3.660  | $\pm 3/2$  | 302.9        | 0.802<br>0.967<br>3.642  | $\pm 3/2$  |
| 5               | 381.9        | 0.057<br>0.339<br>6.037  | $\pm 3/2$  | 394.8        | 0.128<br>0.349<br>6.037  | $\pm 5/2$  | 406.9        | 0.194<br>0.374<br>6.043  | $\pm 5/2$  |
| 6               | 462.9        | 0.079<br>0.088<br>11.465 | $\pm 11/2$ | 455.8        | 0.014<br>0.015<br>12.995 | $\pm 11/2$ | 442.2        | 0.010<br>0.013<br>13.075 | $\pm 11/2$ |
| 7               | 472.1        | 0.105<br>0.126<br>10.103 | $\pm 7/2$  | 486.2        | 0.194<br>0.251<br>8.542  | $\pm 7/2$  | 501.6        | 0.213<br>0.323<br>8.452  | $\pm 7/2$  |
| 8               | 512.2        | 0.015<br>0.016<br>10.805 | $\pm 9/2$  | 520.9        | 0.026<br>0.029<br>10.778 | $\pm 9/2$  | 527.5        | 0.048<br>0.057<br>10.764 | $\pm 9/2$  |



| $\theta$<br>KDs | 42.3°    |                          |                      | 43.3°    |                          |                      | 44.3°    |                          |                      |
|-----------------|----------|--------------------------|----------------------|----------|--------------------------|----------------------|----------|--------------------------|----------------------|
|                 | <i>E</i> | <i>g</i>                 | <i>m<sub>J</sub></i> | <i>E</i> | <i>g</i>                 | <i>m<sub>J</sub></i> | <i>E</i> | <i>g</i>                 | <i>m<sub>J</sub></i> |
| 1               | 0.0      | 0.000<br>0.000<br>17.948 | ±15/2                | 0.0      | 0.000<br>0.000<br>17.948 | ±15/2                | 0.0      | 0.000<br>0.000<br>17.947 | ±15/2                |
| 2               | 208.4    | 0.014<br>0.015<br>15.491 | ±13/2                | 193.0    | 0.011<br>0.012<br>15.516 | ±13/2                | 175.0    | 0.007<br>0.008<br>15.523 | ±13/2                |
| 3               | 229.5    | 9.975<br>9.119<br>1.232  | ±1/2                 | 225.1    | 10.160<br>8.932<br>1.230 | ±1/2                 | 219.4    | 10.094<br>9.007<br>1.227 | ±1/2                 |
| 4               | 303.0    | 0.311<br>0.561<br>3.673  | ±3/2                 | 301.5    | 0.550<br>0.683<br>3.649  | ±3/2                 | 299.3    | 0.482<br>0.609<br>3.652  | ±3/2                 |
| 5               | 416.8    | 0.121<br>0.361<br>6.134  | ±5/2                 | 413.8    | 0.027<br>0.048<br>12.994 | ±5/2                 | 402.7    | 0.008<br>0.012<br>13.083 | ±11/2                |
| 6               | 423.3    | 0.000<br>0.015<br>13.001 | ±11/2                | 419.7    | 0.228<br>0.382<br>6.133  | ±11/2                | 422.0    | 0.289<br>0.432<br>6.058  | ±5/2                 |
| 7               | 514.5    | 0.179<br>0.266<br>8.553  | ±7/2                 | 519.4    | 0.130<br>0.520<br>8.460  | ±7/2                 | 523.4    | 0.046<br>0.706<br>8.545  | ±7/2                 |
| 8               | 530.7    | 0.024<br>0.052<br>10.888 | ±9/2                 | 531.0    | 0.170<br>0.208<br>10.769 | ±9/2                 | 530.2    | 0.330<br>0.405<br>10.818 | ±9/2                 |
| $\theta$<br>KDs | 45.3°    |                          |                      | 46.3°    |                          |                      | 48.3°    |                          |                      |
|                 | <i>E</i> | <i>g</i>                 | <i>m<sub>J</sub></i> | <i>E</i> | <i>g</i>                 | <i>m<sub>J</sub></i> | <i>E</i> | <i>g</i>                 | <i>m<sub>J</sub></i> |
| 1               | 0.0      | 0.000<br>0.000<br>17.946 | ±15/2                | 0.0      | 0.000<br>0.000<br>17.945 | ±15/2                | 0.0      | 0.000<br>0.000<br>17.943 | ±15/2                |
| 2               | 156.6    | 0.006<br>0.006<br>15.528 | ±13/2                | 138.1    | 0.005<br>0.005<br>15.531 | ±13/2                | 101.4    | 0.004<br>0.005<br>15.535 | ±13/2                |
| 3               | 212.9    | 10.033<br>9.072<br>1.227 | ±1/2                 | 205.6    | 9.978<br>9.129<br>1.228  | ±1/2                 | 188.7    | 9.886<br>9.222<br>1.230  | ±1/2                 |
| 4               | 296.1    | 0.421<br>0.544<br>3.655  | ±3/2                 | 292.0    | 0.368<br>0.486<br>3.658  | ±3/2                 | 281.0    | 0.278<br>0.392<br>3.664  | ±3/2                 |
| 5               | 390.7    | 0.005<br>0.007<br>13.087 | ±5/2                 | 378.2    | 0.003<br>0.005<br>13.086 | ±5/2                 | 351.7    | 0.001<br>0.005<br>13.080 | ±5/2                 |
| 6               | 423.2    | 0.323                    | ±11/2                | 423.3    | 0.354                    | ±11/2                | 420.1    | 0.414                    | ±11/2                |

|                 |              |                          |                      |              |                          |                      |              |                          |                      |
|-----------------|--------------|--------------------------|----------------------|--------------|--------------------------|----------------------|--------------|--------------------------|----------------------|
|                 |              | 0.461<br>6.057           |                      |              | 0.489<br>6.059           |                      |              | 0.548<br>6.065           |                      |
| 7               | 526.1        | 0.765<br>1.508<br>9.577  | $\pm 7/2$            | 525.1        | 0.979<br>1.168<br>11.007 | $\pm 9/2$            | 516.3        | 0.319<br>0.416<br>10.699 | $\pm 9/2$            |
| 8               | 528.4        | 1.078<br>1.228<br>11.423 | $\pm 9/2$            | 528.1        | 0.549<br>1.467<br>9.014  | $\pm 7/2$            | 527.6        | 0.176<br>0.882<br>8.413  | $\pm 7/2$            |
| $\theta$<br>KDs | <b>50.3°</b> |                          |                      | <b>52.3°</b> |                          |                      | <b>54.3°</b> |                          |                      |
|                 | <i>E</i>     | <i>g</i>                 | <i>m<sub>J</sub></i> | <i>E</i>     | <i>g</i>                 | <i>m<sub>J</sub></i> | <i>E</i>     | <i>g</i>                 | <i>m<sub>J</sub></i> |
| 1               | 0.0          | 0.000<br>0.000<br>17.940 | $\pm 15/2$           | 0.0          | 0.000<br>0.000<br>17.938 | $\pm 15/2$           | 0.0          | 0.001<br>0.002<br>17.655 | $\pm 15/2$           |
| 2               | 65.8         | 0.004<br>0.005<br>15.539 | $\pm 13/2$           | 32.2         | 0.005<br>0.005<br>15.546 | $\pm 13/2$           | 2.5          | 0.003<br>0.004<br>16.918 | $\pm 13/2$           |
| 3               | 169.0        | 9.812<br>9.293<br>1.232  | $\pm 1/2$            | 146.9        | 9.753<br>9.346<br>1.235  | $\pm 1/2$            | 123.2        | 9.704<br>9.384<br>1.242  | $\pm 1/2$            |
| 4               | 266.5        | 0.205<br>0.319<br>3.669  | $\pm 3/2$            | 248.6        | 0.149<br>0.265<br>3.676  | $\pm 3/2$            | 228.5        | 0.105<br>0.224<br>3.683  | $\pm 3/2$            |
| 5               | 323.7        | 0.000<br>0.006<br>13.072 | $\pm 11/2$           | 295.0        | 0.000<br>0.008<br>13.061 | $\pm 11/2$           | 266.9        | 0.000<br>0.011<br>13.044 | $\pm 11/2$           |
| 6               | 412.3        | 0.473<br>0.613<br>6.072  | $\pm 5/2$            | 400.1        | 0.534<br>0.683<br>6.078  | $\pm 5/2$            | 384.4        | 0.595<br>0.755<br>6.083  | $\pm 5/2$            |
| 7               | 503.3        | 0.235<br>0.315<br>10.674 | $\pm 9/2$            | 486.8        | 0.212<br>0.290<br>10.657 | $\pm 9/2$            | 467.9        | 0.210<br>0.291<br>10.642 | $\pm 9/2$            |
| 8               | 522.2        | 0.326<br>0.842<br>8.383  | $\pm 7/2$            | 512.0        | 0.419<br>0.879<br>8.370  | $\pm 7/2$            | 498.0        | 0.494<br>0.943<br>8.361  | $\pm 7/2$            |

**Table S12.** Wave functions with definite projection of the total moment  $|m_J\rangle$  for the lowest two or three KDs of  $[\text{Er}(\text{COT})_2]^-$  with different included  $\theta$  angle (change the  $\theta$  angles on the two sides of COT ligands simultaneously) keeping the Er-C bond lengths fixed.

| $\theta$     | <i>E/cm<sup>-1</sup></i> | wave functions           |
|--------------|--------------------------|--------------------------|
| <b>36.3°</b> | 0.0                      | 100% $ \pm 15/2\rangle$  |
|              | 242.6                    | 99.2% $ \pm 1/2\rangle$  |
| <b>38.3°</b> | 0.0                      | 100% $ \pm 15/2\rangle$  |
|              | 241.0                    | 99.5% $ \pm 1/2\rangle$  |
| <b>40.3°</b> | 0.0                      | 99.9% $ \pm 15/2\rangle$ |

|       |       |                                     |
|-------|-------|-------------------------------------|
|       | 236.9 | 98.4% ±1/2>                         |
| 42.3° | 0.0   | 99.9% ±15/2>                        |
|       | 208.4 | 99.7% ±13/2>                        |
|       | 229.5 | 99.5% ±1/2>                         |
|       | 0.0   | 100% ±15/2>                         |
| 43.3° | 193.0 | 99.8% ±13/2>                        |
|       | 225.1 | 99.7% ±1/2>                         |
|       | 0.0   | 100% ±15/2>                         |
| 44.3° | 175.0 | 99.9% ±13/2>                        |
|       | 219.4 | 99.7% ±1/2>                         |
|       | 0.0   | 100% ±15/2>                         |
| 45.3° | 156.6 | 99.9% ±13/2>                        |
|       | 212.9 | 99.8% ±1/2>                         |
|       | 0.0   | 100% ±15/2>                         |
| 46.3° | 138.1 | 99.9% ±13/2>                        |
|       | 205.6 | 99.8% ±1/2>                         |
|       | 0.0   | 100% ±15/2>                         |
| 48.3° | 101.4 | 99.8% ±13/2>                        |
|       | 188.7 | 99.8% ±1/2>                         |
|       | 0.0   | 100% ±15/2>                         |
| 50.3° | 65.8  | 99.8% ±13/2>                        |
|       | 169.0 | 99.6% ±1/2>                         |
|       | 0.0   | 100% ±15/2>                         |
| 52.3° | 32.2  | 99.6% ±13/2>                        |
|       | 146.9 | 99.1% ±1/2>                         |
|       | 0.0   | 94.8% ±15/2>                        |
| 54.3° | 2.5   | 68.3% ±13/2>+24.6% ±11/2>           |
|       | 123.2 | 44.6% ±3/2>+40.1% ±1/2>+13.5% ±5/2> |

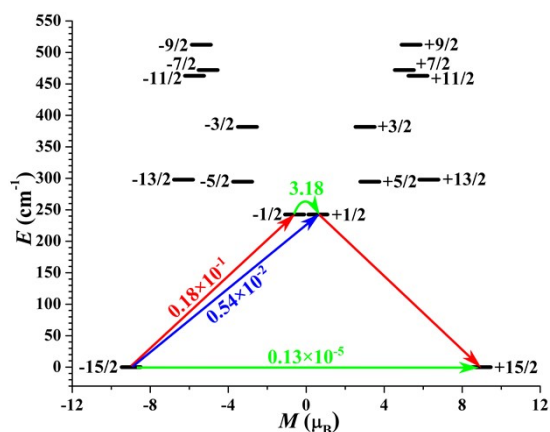

36.3°

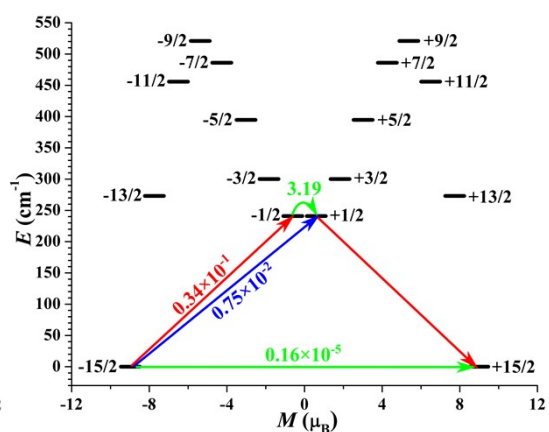

38.3°

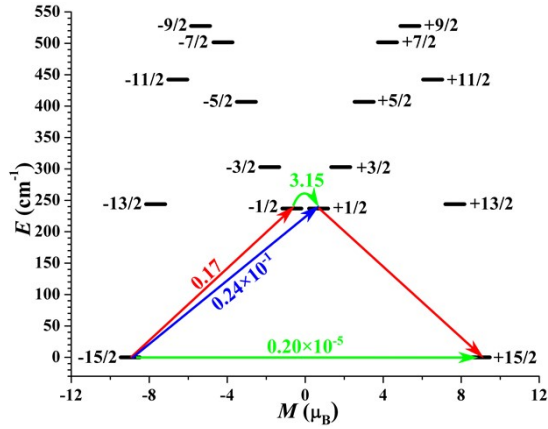

$40.3^\circ$

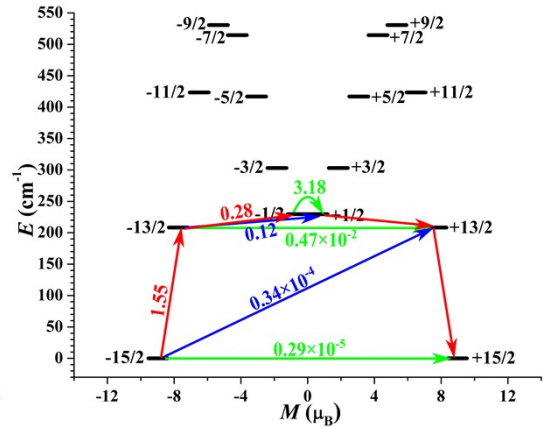

$42.3^\circ$

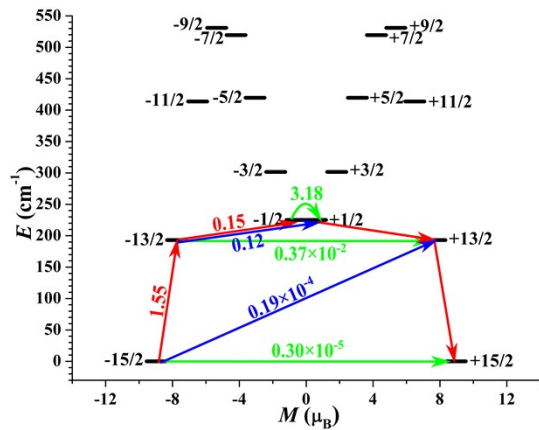

$43.3^\circ$

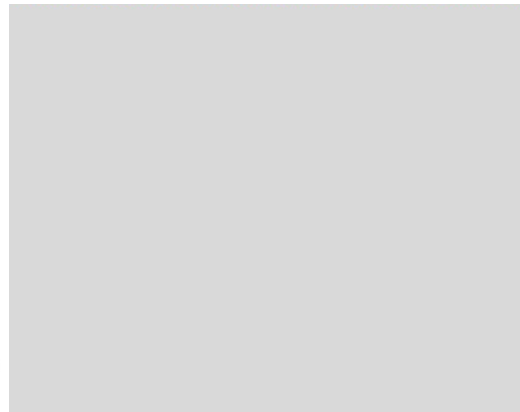

$44.3^\circ$

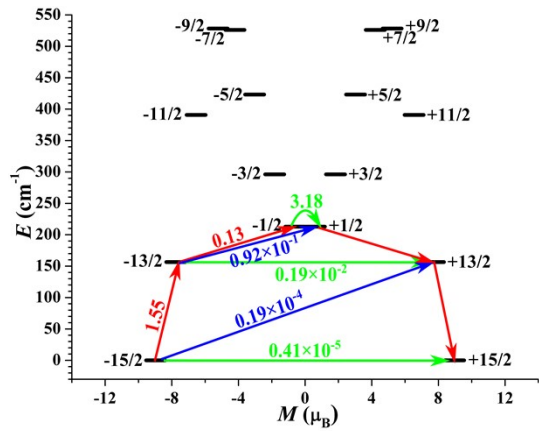

$45.3^\circ$

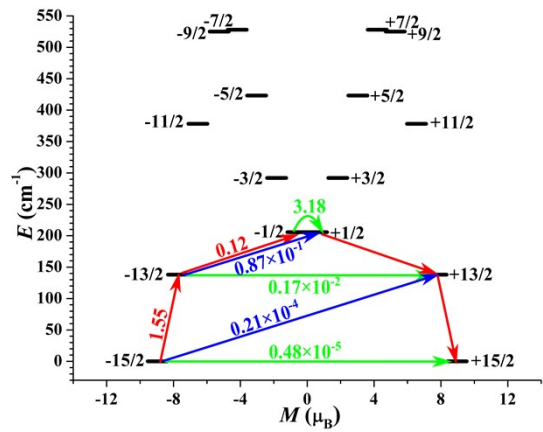

$46.3^\circ$

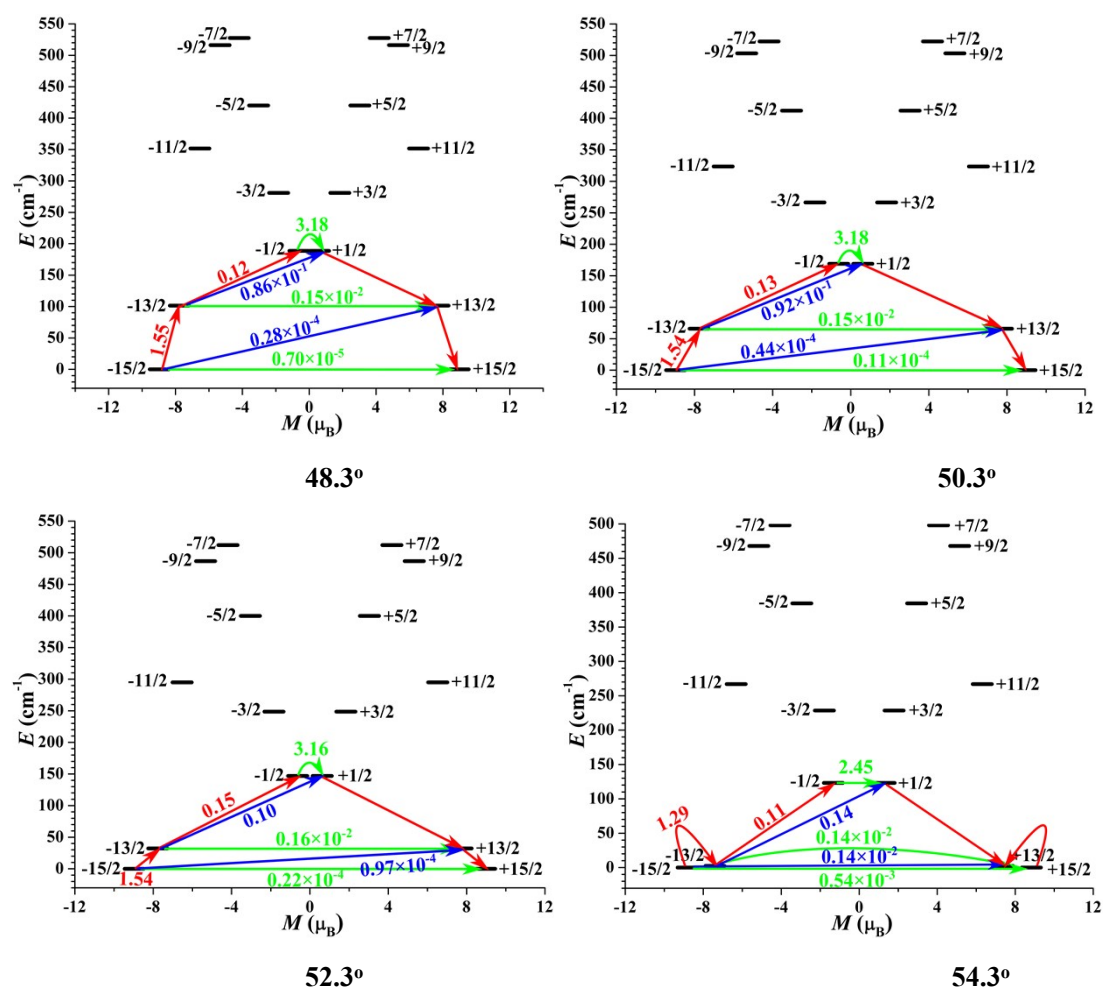

**Figure S6.** Magnetization blocking barriers for  $[\text{Er}(\text{COT})_2]^-$  with different included  $\theta$  angle (change the  $\theta$  angles on the two sides of COT ligands simultaneously) keeping the Er-C bond lengths fixed. The thick black lines represent the KDs as a function of their magnetic moments along the magnetic axes. The green lines correspond to diagonal quantum tunneling of magnetization (QTM); the blue lines represent Orbach relaxation process. The path shown by the red arrows represents the most possibly path for magnetic relaxation in the corresponding compounds. The numbers at each arrow stand for the mean absolute value of the corresponding matrix element of transition magnetic moment.

**Table S13.** The average C-C bond lengths ( $\text{\AA}$ ) of one COT ligands corresponding to different  $\theta$  angles.

| $\theta$ | 36.3° | 38.3° | 40.3° | 42.3° | 44.3° | 46.3° | 48.3° | 50.3° | 52.3° | 54.3° |
|----------|-------|-------|-------|-------|-------|-------|-------|-------|-------|-------|
| C-C      | 1.186 | 1.242 | 1.296 | 1.352 | 1.400 | 1.449 | 1.496 | 1.542 | 1.586 | 1.627 |

**Table S14.** Calculated crystal-field parameters  $B(k, q)$  and the corresponding weights for  $[\text{Er}(\text{COT})_2]^-$  with different included  $\theta$  angles (change the  $\theta$  angles on the two sides of COT ligands simultaneously) keeping the Er-C bond lengths fixed.



|                 |               |                          |                      |               |                          |                      |               |                          |                      |
|-----------------|---------------|--------------------------|----------------------|---------------|--------------------------|----------------------|---------------|--------------------------|----------------------|
| 1               | 0.0           | 10.114<br>8.628<br>1.409 | $\pm 1/2$            | 0.0           | 10.120<br>8.788<br>1.351 | $\pm 1/2$            | 0.0           | 10.066<br>8.930<br>1.315 | $\pm 1/2$            |
| 2               | 705.2         | 0.703<br>0.768<br>4.138  | $\pm 3/2$            | 510.5         | 0.618<br>0.696<br>4.049  | $\pm 3/2$            | 347.4         | 0.127<br>0.154<br>12.789 | $\pm 11/2$           |
| 3               | 1269.2        | 0.007<br>0.008<br>15.482 | $\pm 13/2$           | 702.9         | 0.005<br>0.008<br>15.422 | $\pm 13/2$           | 377.1         | 0.387<br>0.460<br>6.571  | $\pm 5/2$            |
| 4               | 1944.1        | 0.608<br>0.701<br>6.715  | $\pm 5/2$            | 1176.8        | 0.002<br>0.002<br>17.780 | $\pm 15/2$           | 639.3         | 0.000<br>0.001<br>17.855 | $\pm 15/2$           |
| 5               | 2049.8        | 0.016<br>0.018<br>17.469 | $\pm 15/2$           | 1363.8        | 0.673<br>0.779<br>6.343  | $\pm 5/2$            | 964.4         | 0.731<br>0.836<br>6.176  | $\pm 3/2$            |
| 6               | 2329.8        | 0.004<br>0.023<br>12.756 | $\pm 11/2$           | 1521.5        | 0.011<br>0.029<br>12.839 | $\pm 11/2$           | 993.9         | 0.048<br>0.076<br>12.876 | $\pm 13/2$           |
| 7               | 3027.6        | 0.609<br>0.656<br>8.452  | $\pm 7/2$            | 2084.4        | 0.614<br>0.767<br>8.430  | $\pm 7/2$            | 1454.4        | 0.389<br>0.996<br>8.424  | $\pm 7/2$            |
| 8               | 3130.3        | 0.029<br>0.038<br>10.444 | $\pm 9/2$            | 2140.0        | 0.061<br>0.069<br>10.529 | $\pm 9/2$            | 1476.0        | 0.269<br>0.311<br>10.594 | $\pm 9/2$            |
| Er-<br>C<br>KDs | <b>2.32 Å</b> |                          |                      | <b>2.42 Å</b> |                          |                      | <b>2.52 Å</b> |                          |                      |
|                 | <i>E</i>      | <i>g</i>                 | <i>m<sub>J</sub></i> | <i>E</i>      | <i>g</i>                 | <i>m<sub>J</sub></i> | <i>E</i>      | <i>g</i>                 | <i>m<sub>J</sub></i> |
| 1               | 0.0           | 9.959<br>9.068<br>1.309  | $\pm 1/2$            | 0.0           | 7.951<br>7.468<br>4.127  | $\pm 3/2$            | 0.0           | 0.024<br>0.025<br>15.521 | $\pm 13/2$           |
| 2               | 139.4         | 0.007<br>0.013<br>15.439 | $\pm 13/2$           | 11.4          | 1.763<br>1.894<br>12.661 | $\pm 11/2$           | 32.9          | 0.001<br>0.001<br>17.924 | $\pm 15/2$           |
| 3               | 268.8         | 0.385<br>0.482<br>4.002  | $\pm 3/2$            | 93.4          | 0.001<br>0.001<br>17.905 | $\pm 15/2$           | 73.9          | 9.655<br>9.392<br>1.268  | $\pm 1/2$            |
| 4               | 303.2         | 0.005<br>0.007<br>17.729 | $\pm 15/2$           | 197.9         | 0.241<br>0.348<br>3.752  | $\pm 1/2$            | 217.0         | 0.071<br>0.184<br>3.702  | $\pm 3/2$            |
| 5               | 644.2         | 0.022<br>0.030<br>12.971 | $\pm 11/2$           | 411.8         | 0.005<br>0.013<br>13.018 | $\pm 13/2$           | 325.0         | 0.001<br>0.010<br>13.043 | $\pm 11/2$           |
| 6               | 688.6         | 0.623<br>0.758           | $\pm 5/2$            | 497.6         | 0.626<br>0.763           | $\pm 5/2$            | 432.6         | 0.613<br>0.758           | $\pm 5/2$            |

|                 |               |                          |                      |               |                          |                      |               |                          |                      |
|-----------------|---------------|--------------------------|----------------------|---------------|--------------------------|----------------------|---------------|--------------------------|----------------------|
|                 |               | 6.137                    |                      |               | 6.101                    |                      |               | 6.080                    |                      |
| 7               | 1024.1        | 3.209<br>3.672<br>10.373 | $\pm 9/2$            | 715.3         | 0.418<br>0.511<br>10.629 | $\pm 9/2$            | 570.4         | 0.263<br>0.337<br>10.650 | $\pm 9/2$            |
| 8               | 1026.1        | 2.577<br>3.626<br>8.975  | $\pm 7/2$            | 731.5         | 0.298<br>1.198<br>8.360  | $\pm 7/2$            | 595.6         | 0.444<br>1.007<br>8.362  | $\pm 7/2$            |
| Er-<br>C<br>KDs | <b>2.62 Å</b> |                          |                      | <b>2.72 Å</b> |                          |                      | <b>2.82 Å</b> |                          |                      |
|                 | <i>E</i>      | <i>g</i>                 | <i>m<sub>J</sub></i> | <i>E</i>      | <i>g</i>                 | <i>m<sub>J</sub></i> | <i>E</i>      | <i>g</i>                 | <i>m<sub>J</sub></i> |
| 1               | 0.0           | 0.001<br>0.002<br>17.655 | $\pm 15/2$           | 0.0           | 0.000<br>0.000<br>17.941 | $\pm 15/2$           | 0.0           | 0.000<br>0.000<br>17.946 | $\pm 15/2$           |
| 2               | 2.5           | 0.003<br>0.004<br>16.918 | $\pm 13/2$           | 22.3          | 0.002<br>0.002<br>15.551 | $\pm 13/2$           | 35.9          | 0.001<br>0.001<br>15.548 | $\pm 13/2$           |
| 3               | 123.2         | 9.704<br>9.384<br>1.242  | $\pm 1/2$            | 170.7         | 9.954<br>9.099<br>1.254  | $\pm 1/2$            | 197.3         | 10.000<br>8.494<br>1.527 | $\pm 1/2$            |
| 4               | 228.5         | 0.105<br>0.224<br>3.683  | $\pm 3/2$            | 241.4         | 0.058<br>0.096<br>12.805 | $\pm 11/2$           | 219.6         | 0.222<br>0.345<br>12.631 | $\pm 11/2$           |
| 5               | 266.9         | 0.000<br>0.011<br>13.044 | $\pm 11/2$           | 249.0         | 0.331<br>0.462<br>3.885  | $\pm 3/2$            | 256.0         | 0.702<br>0.843<br>3.635  | $\pm 3/2$            |
| 6               | 384.4         | 0.595<br>0.755<br>6.083  | $\pm 5/2$            | 361.6         | 0.575<br>0.761<br>6.144  | $\pm 5/2$            | 337.0         | 0.503<br>0.746<br>6.458  | $\pm 5/2$            |
| 7               | 467.9         | 0.210<br>0.291<br>10.642 | $\pm 9/2$            | 408.4         | 0.185<br>0.306<br>10.575 | $\pm 9/2$            | 359.9         | 0.137<br>0.411<br>10.254 | $\pm 9/2$            |
| 8               | 498.0         | 0.494<br>0.943<br>8.361  | $\pm 7/2$            | 440.8         | 0.528<br>0.938<br>8.358  | $\pm 7/2$            | 392.3         | 0.567<br>0.972<br>8.354  | $\pm 7/2$            |
| Er-<br>C<br>KDs | <b>2.92 Å</b> |                          |                      |               |                          |                      |               |                          |                      |
|                 | <i>E</i>      | <i>g</i>                 | <i>m<sub>J</sub></i> |               |                          |                      |               |                          |                      |
| 1               | 0.0           | 0.000<br>0.000<br>17.949 | $\pm 15/2$           |               |                          |                      |               |                          |                      |
| 2               | 44.1          | 0.001<br>0.001<br>15.549 | $\pm 13/2$           |               |                          |                      |               |                          |                      |
| 3               | 197.5         | 0.618                    | $\pm 11/2$           |               |                          |                      |               |                          |                      |



|   |       |                         |           |
|---|-------|-------------------------|-----------|
|   |       | 0.762<br>12.269         |           |
| 4 | 212.6 | 9.890<br>7.667<br>1.862 | $\pm 1/2$ |
| 5 | 254.7 | 1.125<br>1.284<br>3.610 | $\pm 3/2$ |
| 6 | 309.8 | 0.222<br>0.450<br>8.183 | $\pm 5/2$ |
| 7 | 321.9 | 0.204<br>0.780<br>8.519 | $\pm 9/2$ |
| 8 | 350.8 | 0.626<br>1.062<br>8.347 | $\pm 7/2$ |

**Table S16.** Wave functions with definite projection of the total moment  $|m_J\rangle$  for the lowest two or three KDs for model  $[\text{Er}(\text{COT})_2]^-$  with the different Er-C bond lengths ( $\text{\AA}$ ) keeping the include angles  $\theta = 54.3^\circ$ .

| $\theta$                    | $E/\text{cm}^{-1}$ | wave functions                                                          |
|-----------------------------|--------------------|-------------------------------------------------------------------------|
| <b>2.02</b><br>$\text{\AA}$ | 0.0                | 99.7% $ \pm 1/2\rangle$                                                 |
|                             | 705.2              | 99.6% $ \pm 3/2\rangle$                                                 |
| <b>2.12</b><br>$\text{\AA}$ | 0.0                | 99.7% $ \pm 1/2\rangle$                                                 |
|                             | 510.5              | 99.0% $ \pm 3/2\rangle$                                                 |
| <b>2.22</b><br>$\text{\AA}$ | 0.0                | 99.8% $ \pm 1/2\rangle$                                                 |
|                             | 347.4              | 76.6% $ \pm 13/2\rangle + 23.4\% \pm 3/2\rangle$                        |
| <b>2.32</b><br>$\text{\AA}$ | 0.0                | 99.6% $ \pm 1/2\rangle$                                                 |
|                             | 139.4              | 99.1% $ \pm 13/2\rangle$                                                |
| <b>2.42</b><br>$\text{\AA}$ | 0.0                | 79.1% $ \pm 1/2\rangle + 19.9\% \pm 13/2\rangle$                        |
|                             | 11.4               | 79.1% $ \pm 13/2\rangle + 19.7\% \pm 1/2\rangle$                        |
| <b>2.52</b><br>$\text{\AA}$ | 0.0                | 98.2% $ \pm 13/2\rangle$                                                |
|                             | 32.9               | 98.9% $ \pm 15/2\rangle$                                                |
|                             | 73.9               | 98.5% $ \pm 1/2\rangle$                                                 |
| <b>2.62</b><br>$\text{\AA}$ | 0.0                | 94.8% $ \pm 15/2\rangle$                                                |
|                             | 2.5                | 68.3% $ \pm 13/2\rangle + 24.6\% \pm 11/2\rangle$                       |
|                             | 123.2              | 44.6% $ \pm 3/2\rangle + 40.1\% \pm 1/2\rangle + 13.5\% \pm 5/2\rangle$ |
| <b>2.72</b><br>$\text{\AA}$ | 0.0                | 100% $ \pm 15/2\rangle$                                                 |
|                             | 22.3               | 99.7% $ \pm 13/2\rangle$                                                |
|                             | 170.7              | 98.7% $ \pm 1/2\rangle$                                                 |
| <b>2.82</b><br>$\text{\AA}$ | 0.0                | 100% $ \pm 15/2\rangle$                                                 |
|                             | 35.9               | 99.9% $ \pm 13/2\rangle$                                                |

|           |       |              |
|-----------|-------|--------------|
|           | 197.3 | 95.7% ±1/2>  |
| 2.92<br>Å | 0.0   | 100% ±15/2>  |
|           | 44.1  | 99.9% ±13/2> |
|           | 197.5 | 92.7% ±11/2> |

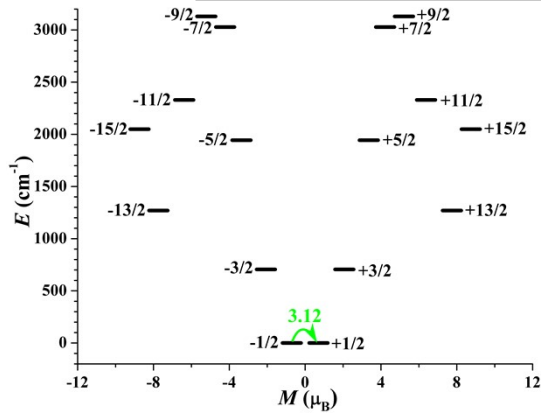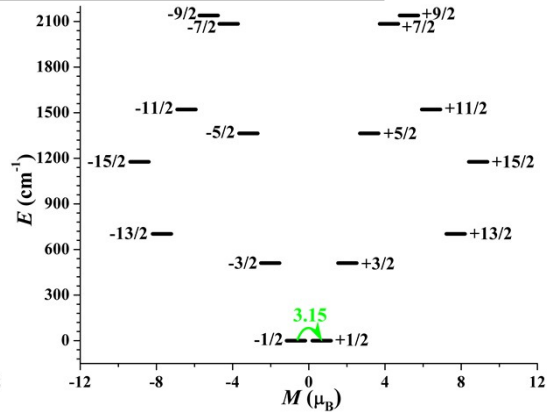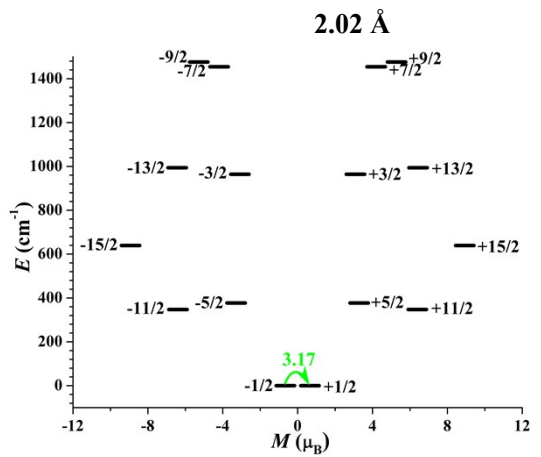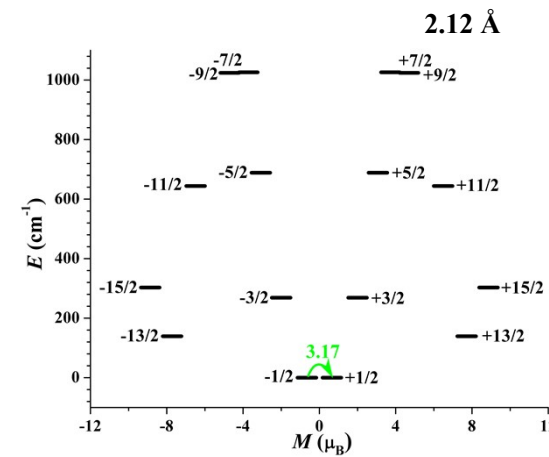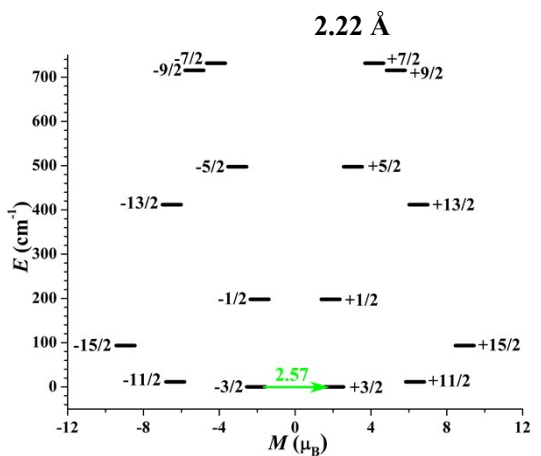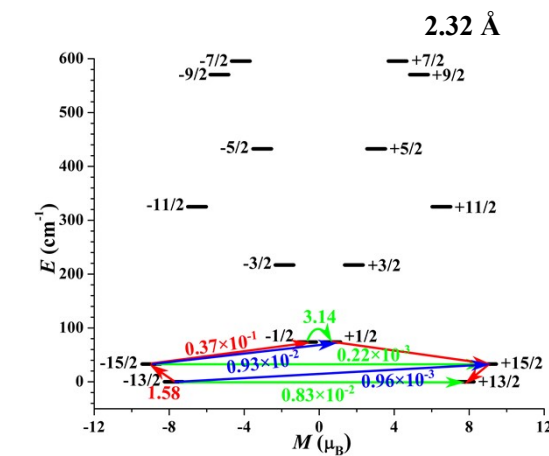

2.42 Å

2.52 Å

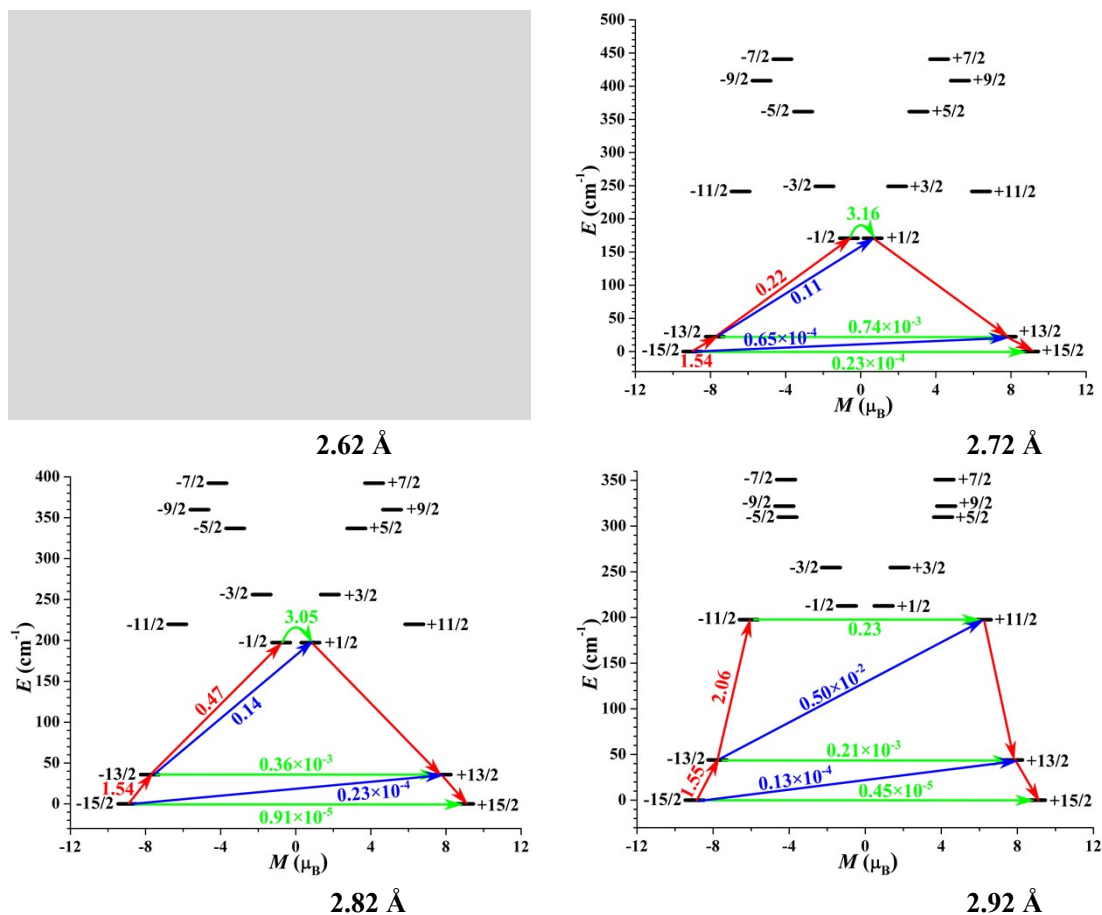

**Figure S7.** Magnetization blocking barriers for model  $[\text{Er}(\text{COT})_2]^-$  with the different Er-C bond lengths keeping the included angles  $\theta = 54.3^\circ$  unchanged. The thick black lines represent the KDs as a function of their magnetic moments along the magnetic axes. The green lines correspond to diagonal quantum tunneling of magnetization (QTM); the blue lines represent Orbach relaxation process. The path shown by the red arrows represents the most possibly path for magnetic relaxation in the corresponding compounds. The numbers at each arrow stand for the mean absolute value of the corresponding matrix element of transition magnetic moment.

**Table S17.** Average C-C bond lengths ( $\text{\AA}$ ) of two COT ligand rings with different Er-C bond lengths ( $\text{\AA}$ ).

|      |       |       |       |       |       |       |       |       |       |       |
|------|-------|-------|-------|-------|-------|-------|-------|-------|-------|-------|
| Er-C | 2.02  | 2.12  | 2.22  | 2.32  | 2.42  | 2.52  | 2.62  | 2.72  | 2.82  | 2.92  |
| C-C  | 1.254 | 1.316 | 1.379 | 1.441 | 1.503 | 1.565 | 1.627 | 1.690 | 1.752 | 1.814 |

**Table S18.** Calculated crystal-field parameters  $B(k, q)$  and the corresponding weights for **6** with the different average Er-C bond lengths keeping  $\theta = 54.3^\circ$  unchanged.

| 2.02 $\text{\AA}$ |     |                        |            | 2.12 $\text{\AA}$ |     |                        |            | 2.22 $\text{\AA}$ |     |                        |            |
|-------------------|-----|------------------------|------------|-------------------|-----|------------------------|------------|-------------------|-----|------------------------|------------|
| $k$               | $q$ | $B(k, q)$              | Weight (%) | $k$               | $q$ | $B(k, q)$              | Weight (%) | $k$               | $q$ | $B(k, q)$              | Weight (%) |
| 6                 | 0   | $0.77 \times 10^{-3}$  | 37.11      | 6                 | 0   | $0.54 \times 10^{-3}$  | 40.17      | 6                 | 0   | $0.39 \times 10^{-3}$  | 43.64      |
| 4                 | 0   | $-0.61 \times 10^{-1}$ | 31.74      | 4                 | 0   | $-0.44 \times 10^{-1}$ | 34.75      | 4                 | 0   | $-0.32 \times 10^{-1}$ | 38.16      |

|               |          |                                  |            |               |          |                                  |            |               |          |                                  |            |
|---------------|----------|----------------------------------|------------|---------------|----------|----------------------------------|------------|---------------|----------|----------------------------------|------------|
| 2             | 0        | $0.54 \times 10^1$               | 15.37      | 2             | 0        | $0.22 \times 10^1$               | 9.43       | 6             | 6        | $0.25 \times 10^{-4}$            | 2.78       |
| 6             | 6        | $0.53 \times 10^{-4}$            | 2.59       | 6             | 6        | $0.36 \times 10^{-4}$            | 2.70       | 6             | 2        | $-0.24 \times 10^{-4}$           | 2.71       |
| <b>2.32 Å</b> |          |                                  |            | <b>2.42 Å</b> |          |                                  |            | <b>2.52 Å</b> |          |                                  |            |
| <i>k</i>      | <i>q</i> | <i>B</i> ( <i>k</i> , <i>q</i> ) | Weight (%) | <i>k</i>      | <i>q</i> | <i>B</i> ( <i>k</i> , <i>q</i> ) | Weight (%) | <i>k</i>      | <i>q</i> | <i>B</i> ( <i>k</i> , <i>q</i> ) | Weight (%) |
| 6             | 0        | $0.28 \times 10^{-3}$            | 41.67      | 6             | 0        | $0.21 \times 10^{-3}$            | 33.37      | 6             | 0        | $0.15 \times 10^{-3}$            | 29.73      |
| 4             | 0        | $-0.23 \times 10^{-1}$           | 36.81      | 4             | 0        | $-0.17 \times 10^{-1}$           | 29.93      | 4             | 0        | $-0.13 \times 10^{-1}$           | 27.00      |
| 2             | 0        | -0.74                            | 6.44       | 2             | 0        | $-0.13 \times 10^1$              | 12.61      | 2             | 0        | $-0.16 \times 10^1$              | 18.58      |
| 6             | 2        | $-0.17 \times 10^{-4}$           | 2.54       | 6             | 1        | $-0.36 \times 10^{-4}$           | 5.87       | 6             | -1       | $0.21 \times 10^{-4}$            | 4.08       |
| <b>2.62 Å</b> |          |                                  |            | <b>2.72 Å</b> |          |                                  |            | <b>2.82 Å</b> |          |                                  |            |
| <i>k</i>      | <i>q</i> | <i>B</i> ( <i>k</i> , <i>q</i> ) | Weight (%) | <i>k</i>      | <i>q</i> | <i>B</i> ( <i>k</i> , <i>q</i> ) | Weight (%) | <i>k</i>      | <i>q</i> | <i>B</i> ( <i>k</i> , <i>q</i> ) | Weight (%) |
| 6             | -1       | $0.11 \times 10^{-3}$            | 12.78      | 2             | 0        | $-0.18 \times 10^1$              | 31.32      | 2             | 0        | $-0.18 \times 10^1$              | 37.65      |
| 2             | 0        | $-0.16 \times 10^1$              | 11.50      | 6             | 0        | $0.88 \times 10^{-4}$            | 25.98      | 6             | 0        | $0.68 \times 10^{-4}$            | 24.34      |
| 4             | -1       | $-0.76 \times 10^{-2}$           | 9.73       | 4             | 0        | $-0.77 \times 10^{-2}$           | 24.21      | 4             | 0        | $-0.60 \times 10^{-2}$           | 23.01      |
| 4             | 0        | $-0.72 \times 10^{-2}$           | 9.30       | 6             | 1        | $-0.12 \times 10^{-4}$           | 3.40       | 2             | 2        | -0.13                            | 2.68       |
| <b>2.92 Å</b> |          |                                  |            |               |          |                                  |            |               |          |                                  |            |
| <i>k</i>      | <i>q</i> | <i>B</i> ( <i>k</i> , <i>q</i> ) | Weight (%) |               |          |                                  |            |               |          |                                  |            |
| 2             | 0        | $-0.17 \times 10^1$              | 42.65      |               |          |                                  |            |               |          |                                  |            |
| 6             | 0        | $0.52 \times 10^{-4}$            | 22.03      |               |          |                                  |            |               |          |                                  |            |
| 4             | 0        | $-0.47 \times 10^{-2}$           | 21.21      |               |          |                                  |            |               |          |                                  |            |
| 2             | 2        | -0.11                            | 2.83       |               |          |                                  |            |               |          |                                  |            |

**Table S19.** Relevant structural parameters of models *a–d*.

| Model    | Formula                            | $\varphi^a$<br>(degree) | Er–C <sup>b</sup><br>(Å) | Er–C <sup>c</sup><br>(Å) | C–C <sup>d</sup><br>(Å) | $\theta_x^e$ (deg<br>ree) | $\theta_{COT}^e$<br>(degree) |
|----------|------------------------------------|-------------------------|--------------------------|--------------------------|-------------------------|---------------------------|------------------------------|
| <i>a</i> | C <sub>13</sub> H <sub>13</sub> Er | 0.7                     | 2.634                    | 2.535                    | 1.420                   | 27.3                      | 47.0                         |
| <i>b</i> | C <sub>14</sub> H <sub>14</sub> Er | 0.9                     | 2.780                    | 2.501                    | 1.415                   | 30.4                      | 47.9                         |
| <i>c</i> | C <sub>16</sub> H <sub>16</sub> Er | 0.0                     | 2.619                    | 2.618                    | 1.400                   | 44.3                      | 44.3                         |
| <i>d</i> | C <sub>17</sub> H <sub>17</sub> Er | 0.7                     | 2.854                    | 2.582                    | 1.418                   | 46.4                      | 46.0                         |

<sup>a</sup> The dihedral angle between the planes of the upper and lower ligand rings. <sup>b</sup> The average Er–C(X) bond lengths for the ligand ring on the other side. <sup>c</sup> The average Er–C(COT) bond lengths. <sup>d</sup> The average C–C bond lengths of the two ligand rings. <sup>e</sup>  $\theta_x$  represents the average included angle between the central axis perpendicular to the X ligand ring, and the vector connecting Er<sup>III</sup> and the nearest X ligand atoms and  $\theta_{COT}$  is the angle for the other side of COT ligand ring.

**Table S20.** Optimized coordinates of model *a* and *b*.

| <i>a</i> |              |              |              | <i>b</i> |              |              |              |
|----------|--------------|--------------|--------------|----------|--------------|--------------|--------------|
|          | <i>x</i> (Å) | <i>y</i> (Å) | <i>z</i> (Å) |          | <i>x</i> (Å) | <i>y</i> (Å) | <i>z</i> (Å) |
| C        | -3.00526216  | 5.93811748   | 6.30770062   | C        | -3.00109177  | 5.94771260   | 6.28698059   |
| C        | -4.02417291  | 6.90988546   | 6.48647246   | C        | -4.02029985  | 6.92010838   | 6.46563000   |

|    |             |             |             |    |             |             |             |
|----|-------------|-------------|-------------|----|-------------|-------------|-------------|
| C  | -4.07355121 | 8.22727350  | 7.01272358  | C  | -4.06905743 | 8.23920288  | 6.98917147  |
| C  | -3.12418148 | 9.11870421  | 7.57732701  | C  | -3.11836263 | 9.13218376  | 7.55064735  |
| C  | -1.73252194 | 9.06171537  | 7.85038873  | C  | -1.72570769 | 9.07582471  | 7.82150392  |
| C  | -0.71355361 | 8.08981810  | 7.67149561  | C  | -0.70657926 | 8.10325315  | 7.64354769  |
| C  | -0.66418027 | 6.77249743  | 7.14542281  | C  | -0.65794935 | 6.78404580  | 7.12036432  |
| C  | -1.61348983 | 5.88100586  | 6.58085763  | C  | -1.60843547 | 5.89127201  | 6.55824247  |
| Er | -2.70308340 | 6.85902766  | 8.64947598  | Er | -2.68619951 | 6.89365878  | 8.57926140  |
| C  | -3.93442431 | 5.18303157  | 10.26693060 | C  | -4.28283886 | 5.31288593  | 10.21399283 |
| C  | -2.54498044 | 4.96274272  | 10.47205514 | C  | -4.42765212 | 6.61608091  | 10.72754603 |
| C  | -2.00071698 | 6.12670347  | 11.08056362 | C  | -3.31200206 | 7.29157662  | 11.25879680 |
| C  | -4.24900302 | 6.48313954  | 10.74865407 | C  | -2.05166252 | 6.66353579  | 11.27684841 |
| C  | -3.05387638 | 7.06643527  | 11.25158241 | C  | -1.90699121 | 5.36026081  | 10.76343118 |
| H  | -3.39655085 | 4.98743989  | 5.93988845  | C  | -3.02251126 | 4.68478256  | 10.23184653 |
| H  | -5.01320794 | 6.52951515  | 6.22321499  | H  | -3.38993645 | 5.00162400  | 5.90654622  |
| H  | -5.09143761 | 8.61978324  | 7.05750732  | H  | -5.00716347 | 6.54469917  | 6.18959261  |
| H  | -3.58513136 | 10.03430964 | 7.95337504  | H  | -5.08442332 | 8.63802163  | 7.02037746  |
| H  | -1.37680135 | 9.94410901  | 8.38614463  | H  | -3.57593450 | 10.05491014 | 7.91153016  |
| H  | 0.23979471  | 8.40203288  | 8.10259638  | H  | -1.36618421 | 9.96556406  | 8.34128357  |
| H  | 0.31784217  | 6.31142650  | 7.26887284  | H  | 0.25089647  | 8.42228720  | 8.05886570  |
| H  | -1.18843403 | 4.89701965  | 6.37291628  | H  | 0.32803459  | 6.32892459  | 7.22864426  |
| H  | -4.63662843 | 4.47554617  | 9.83019065  | H  | -1.18018625 | 4.91216093  | 6.33692285  |
| H  | -1.99685640 | 4.05703176  | 10.21987132 | H  | -5.14777215 | 4.78812631  | 9.80675087  |
| H  | -0.96300849 | 6.26802996  | 11.37656684 | H  | -5.40465349 | 7.10051348  | 10.71792133 |
| H  | -5.23438881 | 6.94515148  | 10.74597699 | H  | -3.42522407 | 8.29902015  | 11.66077791 |
| H  | -2.96386357 | 8.05313691  | 11.70188788 | H  | -1.18870565 | 7.18459060  | 11.69299514 |
|    |             |             |             | H  | -0.93196254 | 4.87204704  | 10.78172012 |
|    |             |             |             | H  | -2.91140386 | 3.67374585  | 9.83856068  |

**Table S21.** Calculated energy levels ( $\text{cm}^{-1}$ ),  $\mathbf{g}$  ( $g_x, g_y, g_z$ ) tensors and predominant  $m_J$  values of the lowest eight KDs for models *a-d* using CASSCF/RASSI-SO with OpenMolcas.

| KDs | <i>a</i> |                          |            | <i>b</i> |                          |            | <i>c</i> |                          |            | <i>d</i> |                          |            |
|-----|----------|--------------------------|------------|----------|--------------------------|------------|----------|--------------------------|------------|----------|--------------------------|------------|
|     | <i>E</i> | <i>g</i>                 | $m_J$      |
| 1   | 0.0      | 0.000<br>0.000<br>17.948 | $\pm 15/2$ | 0.0      | 0.000<br>0.000<br>17.950 | $\pm 15/2$ | 0.0      | 0.000<br>0.000<br>17.947 | $\pm 15/2$ | 0.0      | 0.000<br>0.000<br>17.949 | $\pm 15/2$ |
| 2   | 197.8    | 0.064<br>5.284<br>11.056 | $\pm 5/2$  | 188.3    | 0.000<br>0.000<br>15.539 | $\pm 13/2$ | 175.0    | 0.007<br>0.008<br>15.523 | $\pm 13/2$ | 142.4    | 0.000<br>0.000<br>15.540 | $\pm 13/2$ |
| 3   | 201.1    | 8.363<br>6.323<br>1.680  | $\pm 7/2$  | 276.8    | 0.000<br>0.000<br>13.154 | $\pm 11/2$ | 219.4    | 10.094<br>9.007<br>1.227 | $\pm 1/2$  | 271.3    | 9.615<br>9.466<br>1.225  | $\pm 1/2$  |
| 4   | 206.1    | 3.416<br>2.815<br>1.297  | $\pm 7/2$  | 319.4    | 0.027<br>0.027<br>10.772 | $\pm 9/2$  | 299.3    | 0.482<br>0.609<br>3.652  | $\pm 3/2$  | 335.7    | 0.060<br>0.089<br>3.641  | $\pm 3/2$  |

|   |       |                          |            |       |                         |           |       |                          |            |       |                          |            |
|---|-------|--------------------------|------------|-------|-------------------------|-----------|-------|--------------------------|------------|-------|--------------------------|------------|
| 5 | 211.2 | 8.693<br>8.218<br>0.497  | $\pm 1/2$  | 343.1 | 0.989<br>1.066<br>8.542 | $\pm 7/2$ | 402.7 | 0.008<br>0.012<br>13.083 | $\pm 11/2$ | 354.7 | 0.001<br>0.001<br>13.104 | $\pm 11/2$ |
| 6 | 217.1 | 0.130<br>0.466<br>11.147 | $\pm 13/2$ | 360.2 | 1.001<br>1.027<br>6.168 | $\pm 5/2$ | 422.0 | 0.289<br>0.432<br>6.058  | $\pm 5/2$  | 431.8 | 0.036<br>0.066<br>6.029  | $\pm 5/2$  |
| 7 | 226.3 | 0.089<br>0.127<br>8.610  | $\pm 9/2$  | 373.2 | 0.311<br>0.354<br>3.675 | $\pm 3/2$ | 523.4 | 0.046<br>0.706<br>8.545  | $\pm 7/2$  | 486.9 | 0.015<br>0.022<br>10.744 | $\pm 9/2$  |
| 8 | 249.2 | 0.903<br>0.954<br>13.062 | $\pm 11/2$ | 380.7 | 9.891<br>9.219<br>1.193 | $\pm 1/2$ | 530.2 | 0.330<br>0.405<br>10.818 | $\pm 9/2$  | 502.6 | 0.031<br>0.069<br>8.416  | $\pm 7/2$  |

**Table S22.** Wave functions with definite projection of the total moment  $|m_J\rangle$  for the lowest two, three or five KDs for models *a-d*.

| $\theta$ | $E/\text{cm}^{-1}$ | wave functions                                                            |
|----------|--------------------|---------------------------------------------------------------------------|
| <i>a</i> | 0.0                | 100% $ \pm 15/2\rangle$                                                   |
|          | 197.8              | 71.3% $ \pm 5/2\rangle$ +15.0% $ \pm 3/2\rangle$ +11.5% $ \pm 7/2\rangle$ |
| <i>b</i> | 0.0                | 100% $ \pm 15/2\rangle$                                                   |
|          | 188.3              | 99.8% $ \pm 13/2\rangle$                                                  |
|          | 276.8              | 99.2% $ \pm 11/2\rangle$                                                  |
|          | 319.4              | 99.0% $ \pm 9/2\rangle$                                                   |
|          | 343.1              | 99.0% $ \pm 7/2\rangle$                                                   |
| <i>c</i> | 0.0                | 100% $ \pm 15/2\rangle$                                                   |
|          | 175.0              | 99.9% $ \pm 13/2\rangle$                                                  |
|          | 219.4              | 99.7% $ \pm 1/2\rangle$                                                   |
| <i>d</i> | 0.0                | 100% $ \pm 15/2\rangle$                                                   |
|          | 142.4              | 100% $ \pm 13/2\rangle$                                                   |
|          | 271.3              | 99.9% $ \pm 1/2\rangle$                                                   |

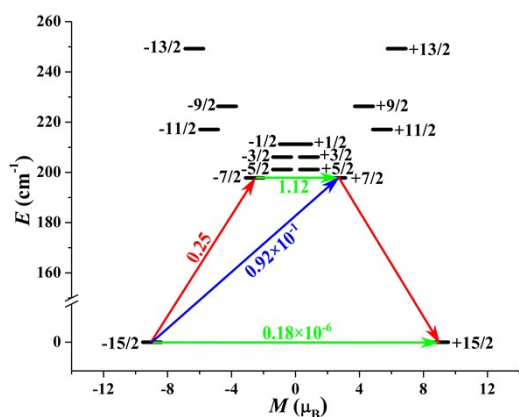

*a*

*c*

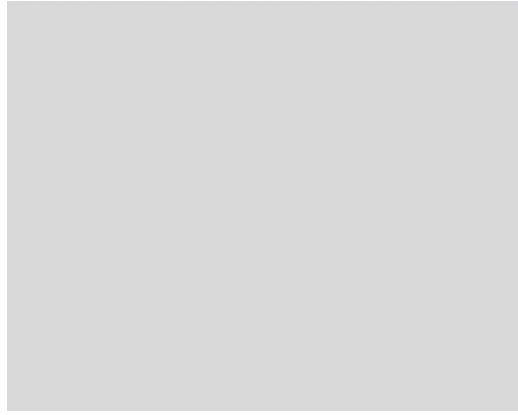

*d*

**Figure S8.** Magnetization blocking barriers for model *a*, *c* and *d*. The thick black lines represent the KDs as a function of their magnetic moments along the magnetic axes. The green lines correspond to diagonal quantum tunneling of magnetization (QTM); the blue lines represent Orbach relaxation process. The path shown by the red arrows represents the most possibly path for magnetic relaxation in the corresponding compounds. The numbers at each arrow stand for the mean absolute value of the corresponding matrix element of transition magnetic moment.

**Table S23.** Calculated crystal-field parameters  $B(k, q)$  and the corresponding weights for models *a–d*.

| <i>a</i> |          |                        |            | <i>b</i> |          |                        |            | <i>c</i> |          |                        |            |
|----------|----------|------------------------|------------|----------|----------|------------------------|------------|----------|----------|------------------------|------------|
| <i>k</i> | <i>q</i> | $B(k, q)$              | Weight (%) | <i>k</i> | <i>q</i> | $B(k, q)$              | Weight (%) | <i>k</i> | <i>q</i> | $B(k, q)$              | Weight (%) |
| 4        | 0        | $-0.48 \times 10^{-2}$ | 34.90      | 2        | 0        | $-0.20 \times 10^1$    | 67.65      | 4        | 0        | $-0.12 \times 10^{-1}$ | 38.68      |
| 2        | 0        | $-0.79$                | 31.67      | 4        | 0        | $-0.35 \times 10^{-2}$ | 20.89      | 2        | 0        | $-0.17 \times 10^1$    | 29.31      |
| 6        | 0        | $-0.30 \times 10^{-4}$ | 20.38      | 6        | 0        | $-0.11 \times 10^{-4}$ | 6.11       | 6        | 0        | $0.66 \times 10^{-4}$  | 19.43      |
| 6        | -5       | $0.82 \times 10^{-5}$  | 5.59       | 6        | 1        | $-0.33 \times 10^{-5}$ | 1.88       | 2        | 2        | $0.98 \times 10^{-1}$  | 1.68       |
| <i>d</i> |          |                        |            |          |          |                        |            |          |          |                        |            |
| <i>k</i> | <i>q</i> | $B(k, q)$              | Weight (%) |          |          |                        |            |          |          |                        |            |
| 2        | 0        | $-0.20 \times 10^1$    | 40.74      |          |          |                        |            |          |          |                        |            |
| 4        | 0        | $-0.96 \times 10^{-2}$ | 34.98      |          |          |                        |            |          |          |                        |            |
| 6        | 0        | $0.61 \times 10^{-4}$  | 20.77      |          |          |                        |            |          |          |                        |            |
| 6        | -5       | $0.26 \times 10^{-5}$  | 0.90       |          |          |                        |            |          |          |                        |            |

## References

- S1. F. Aquilante, J. Autschbach, R. K. Carlson, L. F. Chibotaru, M. G. Delcey, L. De Vico, I. F. Galván, N. Ferré, L. M. Frutos, L. Gagliardi, M. Garavelli, A. Giussani, C. E. Hoyer, G. Li Manni, H. Lischka, D. Ma, P. Å. Malmqvist, T. Müller, A. Nenov, M. Olivucci, T. B. Pedersen, D. Peng, F. Plasser, B. Pritchard, M. Reiher, I. Rivalta, I. Schapiro, J. Segarra-Martí, M. Stenrup, D. G. Truhlar, L. Ungur, A. Valentini, S. Vancoillie, V. Veryazov, V. P. Vysotskiy, O. Weingart, F. Zapata and R. Lindh, *J. Comput. Chem.*, 2016, **37**, 506–541.
- S2. F. Neese, ORCA—*an ab initio, density functional and semiempirical program package*, Version 5.0.1; Max-Planck institute for bioinorganic chemistry: Mülheim an der Ruhr, Germany, 2021.
- S3. C. Angeli, R. Cimiraglia and J. P. Malrieu, *J. Chem. Phys.*, 2002, **117**, 9138–9153.
- S4. C. Angeli, R. Cimiraglia, S. Evangelisti, T. Leininger and J. P. Malrieu, *J. Chem. Phys.*, 2001, **114**, 10252–10264.
- S5. C. Angeli, R. Cimiraglia and J. P. Malrieu, *Chem. Phys. Lett.*, 2001, **350**, 297–305.
- S6. C. Angeli and R. Cimiraglia, *Theor. Chem. Acc.*, 2002, **107**, 313–317.
- S7. D. Aravena, F. Neese and D. A. Pantazis, *J. Chem. Theory Comput.*, 2016, **12**, 1148–1156.
- S8. F. Weigend and R. Ahlrichs, *Phys. Chem. Chem. Phys.*, 2005, **7**, 3297–3305.
- S9. M. Roemelt and F. Neese, *J. Phys. Chem. A*, 2013, **117**, 3069–3083.
